# 1 **Early postnatal inhibitory circuit development in the mouse medial prefrontal** 2 **and primary somatosensory cortex**

3 Katerina Kalemaki<sup>1,2</sup>, Xi Xia Xu<sup>3</sup>, Ileana L. Hanganu-Opatz<sup>3</sup>, Kyriaki Sidiropoulou<sup>2,4\*</sup> and Domna  
4 Karagogeos<sup>1, 2\*</sup>

5  
6 <sup>1</sup>Department of Basic Science, Faculty of Medicine, University of Crete, Heraklion, Greece

7 <sup>2</sup>Institute of Molecular Biology and Biotechnology (IMBB), FORTH, Heraklion, Greece

8 <sup>3</sup>Developmental Neurophysiology, Institute of Neuroanatomy, University Medical Center  
9 Hamburg-Eppendorf, Hamburg, Germany

10 <sup>4</sup>Department of Biology, University of Crete, Heraklion, Greece

11 \* co-corresponding author and equal senior contribution

12

## 13 **Abstract**

14 The prefrontal cortex (PFC) is characterized by delayed maturation that extends until  
15 adulthood. Although the adolescent PFC has been well investigated, the cellular mechanisms  
16 controlling the early development of prefrontal circuits are still largely unknown. Our study  
17 delineates the developmental cellular processes that are on-going in the mouse medial PFC  
18 (mPFC) during the second and third postnatal weeks and compares them to those in the barrel  
19 cortex (BC). We show that basal synaptic transmission decreases from the second to the third  
20 postnatal week in both brain areas due to increased spontaneous inhibitory currents and  
21 reduced excitatory ones. Furthermore, increasing GABA<sub>A</sub> receptor (GABA<sub>A</sub>R) activity leads to  
22 increased basal synaptic response of neonatal mPFC, but not BC. Additionally, the K-Cl co-  
23 transporter 2 (KCC2) expression is decreased in the neonatal mPFC compared to the pre-  
24 juvenile one as well as to the neonatal and pre-juvenile BC, suggesting that GABA<sub>A</sub>R function  
25 in the neonatal mPFC is non-inhibitory. Moreover, the intrinsic properties of both  
26 interneurons and pyramidal cells change with age and relate to augmented network activity  
27 across development.

28

29 **Keywords:** development, prefrontal cortex, barrel cortex, GABA<sub>A</sub>R, interneurons, KCC2.

30

## 31 **Abbreviations**

32 BC: Barrel Cortex  
33 mPFC: medial Prefrontal Cortex  
34 P10: Postnatal day 10  
35 PNs: Pyramidal neurons  
36 INs: Interneurons

37

## 38 **Introduction**

39 During early postnatal development, major events that contribute to cortical circuit  
40 maturation include spatial and temporal patterns of electrical activity, intrinsically  
41 determined cell death of early postnatal cortical interneurons and the depolarizing action of  
42 the neurotransmitter GABA ( $\gamma$ -aminobutyric acid)<sup>1-9</sup>. The developmental switch of GABA  
43 action from depolarizing to hyperpolarizing results from changes in chloride co-transporter  
44 expression:  $\text{Na}^+\text{-K}^+\text{-Cl}^-$  cotransporter 1 (NKCC1), the  $\text{Cl}^-$  importer, is highly expressed early in  
45 development, while the expression of the co-transporter KCC2, the  $\text{Cl}^-$  exporter, increases  
46 after the first postnatal week<sup>10-13</sup>. In addition, both intrinsic properties of neurons and  
47 synaptic transmission undergo dramatic changes during early postnatal development in a  
48 brain-area specific manner<sup>14-18</sup>.

49 Most studies on these developmental changes of the GABAergic system in the cortex  
50 have focused on the primary somatosensory cortex, visual cortex and hippocampus<sup>19-21</sup>. The  
51 barrel cortex (BC) is part of the primary somatosensory cortex and is organised vertically in  
52 columns of cells associated with sensory perception<sup>22</sup> and horizontally in six layers of distinct  
53 cell types. In contrast, cortical association areas such as the prefrontal cortex (PFC) regulate  
54 cognitive functions and do not directly control sensory information<sup>23</sup>. Anatomically, the  
55 mouse medial PFC (mPFC) is defined as the agranular part of frontal lobe, lacking the  
56 prominent granular layer IV and is divided into distinct subregions, namely infralimbic,  
57 prelimbic and cingulate cortex<sup>24,25</sup>. The timeline of mPFC development is delayed compared  
58 to other sensory cortices, such as BC<sup>26-28</sup>. From infancy to adulthood, the developing mPFC  
59 undergoes considerable transcriptional, structural, neuronal changes<sup>28-32</sup>.

60 While adolescent development of prefrontal circuitry and the underlying cellular  
61 mechanisms have been addressed by a large number of studies, only few investigations  
62 tackled the wiring processes at earlier stages<sup>5,33,34</sup>. However, specific knowledge is missing for  
63 the physiological and cellular changes that are on-going in the mPFC between the second

64 (neonatal) and third (pre-juvenile) postnatal week. Here, we aim to fill this gap by  
65 investigating the synaptic and intrinsic properties of neonatal and pre-juvenile mPFC neurons  
66 and comparing them to those in the BC, with a primary focus on the GABAergic system.

67

## 68 **Results**

69 Mice belonging to two age groups were investigated: (i) neonatal mice included pups of  
70 postnatal days (P) 9-11 and are defined as P10 while (ii) pre-juvenile mice defined as P20  
71 animals including pups of P19-P21. Due to the high density of intra-cortical synapses in the  
72 superficial cortical layers<sup>35,36</sup>, we focused on the superficial layers of the subdivision of the  
73 mPFC and on the superficial layers of the BC. From each mouse brain, both the mPFC and the  
74 BC were studied. All analyses that had four groups (mPFC P10 and P20, BC P10 and P20) were  
75 conducted using two-way ANOVA, with the two factors being the brain area (mPFC and BC)  
76 and age (P10 and P20).

77

### 78 **Synaptic transmission decreased in mPFC and BC across development**

79 First, we investigated the synaptic properties of mPFC and BC in neonatal compared  
80 to juvenile mice. We measured basal synaptic transmission using extracellular field recordings  
81 in brain slices. The evoked field excitatory postsynaptic potentials (fEPSPs) in layer II/III of  
82 both areas were recorded in response to current pulses of increasing intensity through the  
83 stimulating electrodes in layer II/III (**Figure 1a,c**). The fEPSPs were significantly decreased in  
84 both mPFC and BC at P20 compared to P10 (**Figure 1b,d**).

85 The decreased fEPSP responses at P20, compared to P10 (**Figure 1b,d**), could result  
86 from either increased inhibitory postsynaptic currents or decreased excitatory postsynaptic  
87 currents. To examine this, we performed patch-clamp recordings from layer II/III pyramidal  
88 neurons in mPFC and BC from P10 and P20 mice. We recorded spontaneous inhibitory  
89 postsynaptic currents (sIPSCs) at +10mV and spontaneous excitatory postsynaptic currents  
90 (sEPSCs) at -60mV and we measured the frequency, amplitude and decay time constant.

91 In mPFC, the frequency of sIPSCs was significantly augmented at P20 compared to P10  
92 (**Figure 2a,b**), while the sIPSC amplitude and decay-time constant did not significantly change  
93 over the investigated time window (**Figure 2a,c,d**). In BC, sIPSC frequency and amplitude were  
94 significantly increased, at P20 compared to P10 (**Figure 2a,b,c**), while the decay-time constant  
95 was not altered (**Figure 2a,d**). When comparing the two brain areas, we noticed a significantly

96 lower sIPSC frequency in the mPFC compared to BC at both ages (**Figure 2a**). The decay time  
97 constant were similar (**Figure 2a,d**), while the sIPSC amplitude was significantly smaller at P20  
98 in the mPFC compared to BC (**Figure 2a,b**).

99 The sEPSC frequency was significantly decreased at P20 compared to P10, in both areas  
100 (**Figure 2e,f**), while the amplitude and decay time constant were unaltered (**Figure 2e,g,h**).  
101 Upon comparing the two brain areas, the sEPSC frequency and amplitude were found  
102 significantly decreased in mPFC, compared to BC, at P10 (**Figure 2e,f**). At P20, the sEPSC  
103 frequency was similar between the two cortical areas, while the amplitude remained  
104 significantly smaller in mPFC compared to BC in both ages (**Figure 2e,g**). The decay time  
105 constant was not different between areas at both ages (**Figure 2e, h**).

106 The combination of reduced sEPSC and increased sIPSC frequency can underlie the  
107 fEPSP reduction from P10 to P20 in mPFC and BC (**Figure 1b,d**).

108

## Figure 1

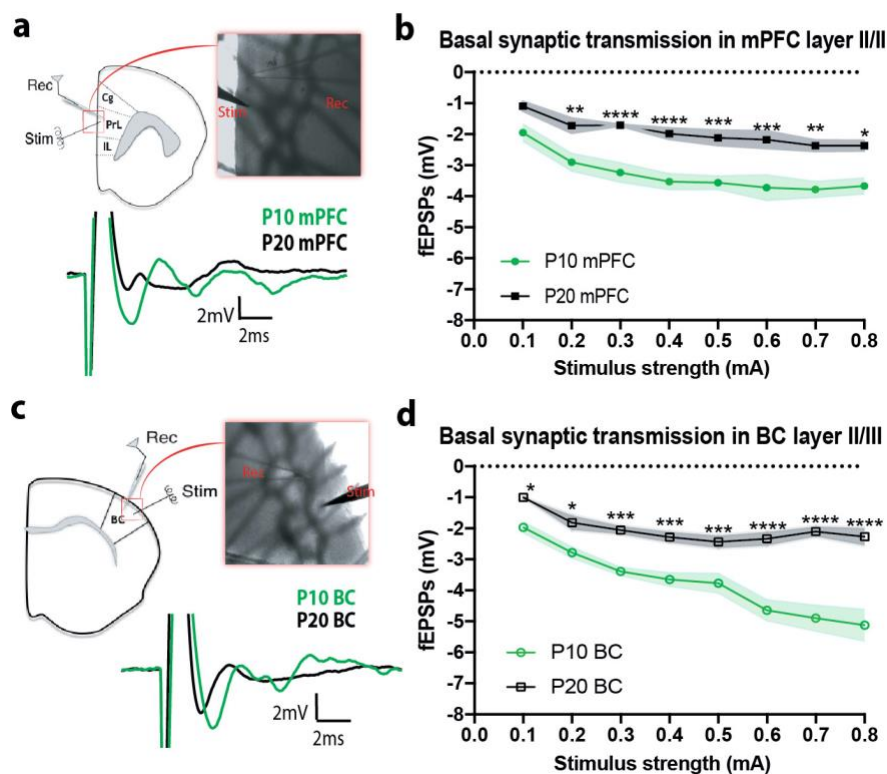

109

110 **Figure 1. Basal Synaptic transmission is decreased in mPFC and BC across development**

111 (a, c) (Top) Schematic representative photos showing the position of the electrodes in mPFC and BC brain slices  
112 (Rec: recording electrode, Stim: stimulating electrode). (Bottom) Representative traces showing the evoked field  
113 excitatory postsynaptic potentials (fEPSPs).

114 (b,d) Graphs showing the fEPSPs recorded in response to current pulses of increasing stimulus strength in layer  
 115 II/III of mPFC (b) and BC (d). Two-way repeated measures ANOVA analyses of evoked fEPSPs revealed a  
 116 significant effect of stimulus strength ( $F_{(7, 82)} = 19.17$ ,  $p < 0.0001$ ) and ages ( $F_{(1, 82)} = 212.3$ ,  $p < 0.0001$ ). Post-hoc  
 117 analysis showed the fEPSPs significantly decreased at P20 compared to P10 in layer II/III of mPFC (Sidak's test,  
 118 \* $p = 0.0106$ , \*\* $p = 0.0012$ , \*\*\* $p = 0.0003$  and \*\*\*\* $p < 0.0001$ ) and BC (Sidak's test, \* $p = 0.0279$ , \*\*\* $p = 0.0006$  and  
 119 \*\*\*\* $p < 0.0001$ ), ( $n = 6-7$  brain slices from 3-4 WT male mice).  
 120

## Figure 2

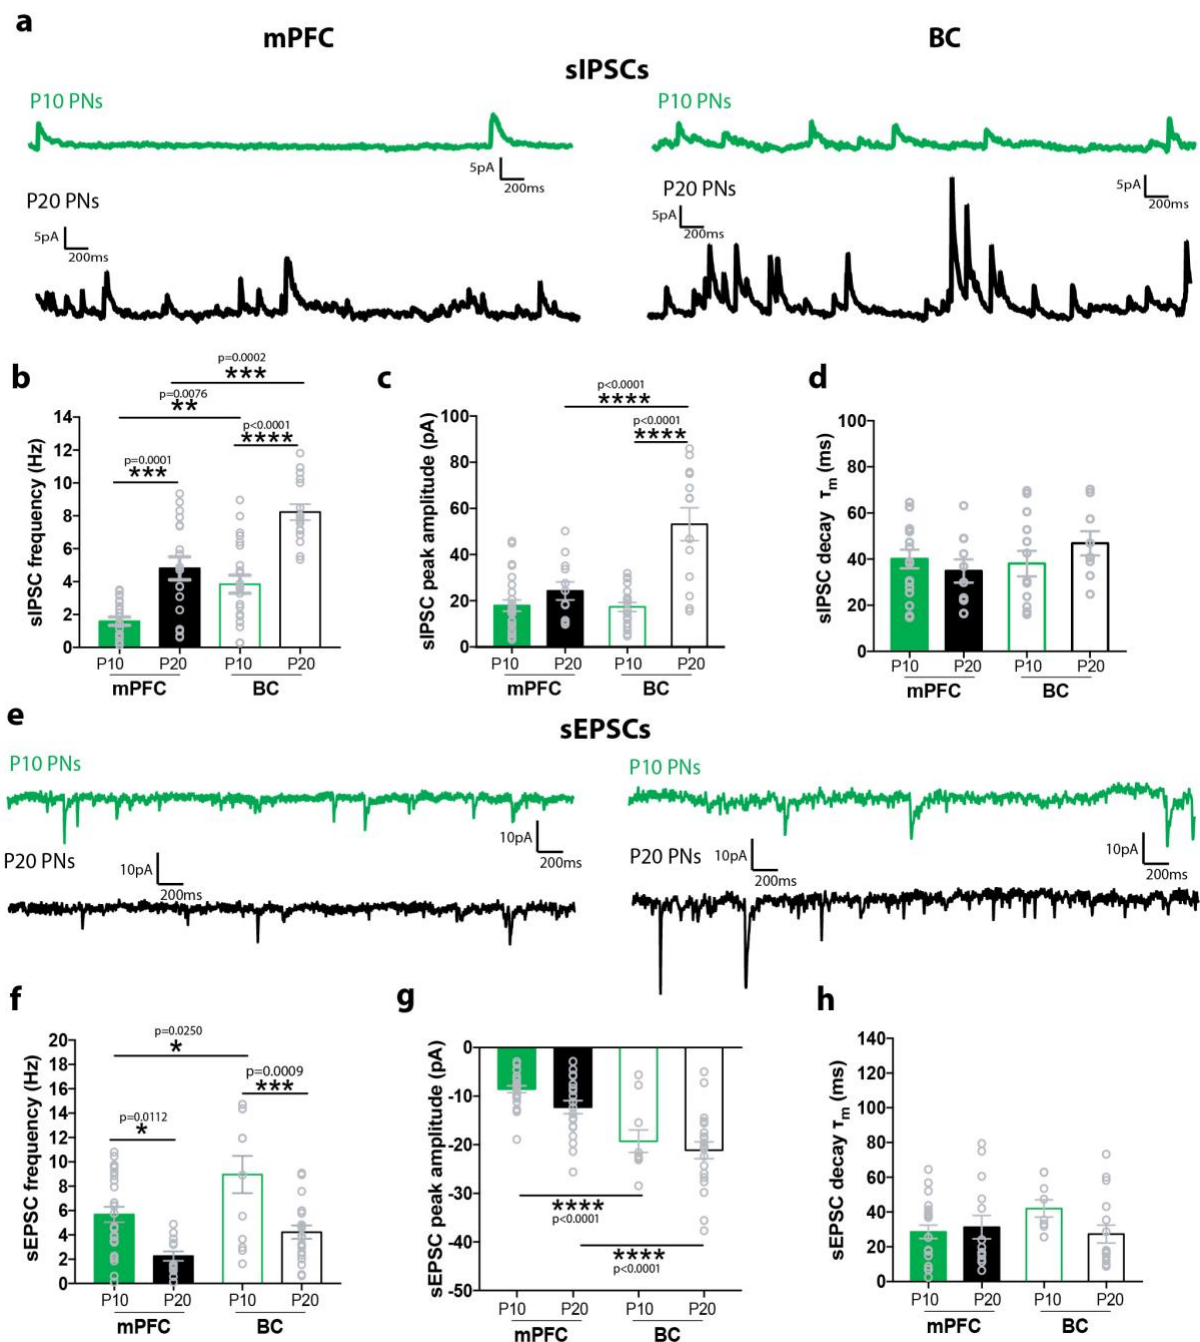

121

122

Figure 2. Properties of sIPSCs and sEPSCs at P10 and P20 of layer II/III mPFC and BC pyramidal neurons

123 **(a)** Representative traces of spontaneous inhibitory postsynaptic currents (sIPSCs) from layer II/III mPFC (left)  
124 and BC (right) pyramidal neurons at P10 (green) and P20 (black).

125 **(b)** Bar graph showing the sIPSC frequency (Hz) at P10 and P20 mPFC and BC pyramidal neurons. Two-way  
126 ANOVA analyses showed a significant effect of age ( $F_{(1,74)}=54.74$ ,  $p<0.0001$ ) and brain area ( $F_{(1,74)}=30.36$ ,  
127  $p<0.0001$ ). Post-hoc analysis showed that sIPSC frequency was significantly increased at P20 compared to P10  
128 in mPFC (Tukey's test,  $p=0.0001$ ) as well as in BC (Tukey's test,  $p<0.0001$ ). Furthermore, sIPSC frequency was  
129 significantly decreased in mPFC compared to BC at P10 (Tukey's test,  $p=0.0076$ ) as well as at P20 (Tukey's test,  
130  $p=0.0002$ ), ( $n=9-13$  cells from 5-9 mice/age group).

131 **(c)** Bar graph showing the sIPSC peak amplitude at P10 and P20 of mPFC and BC pyramidal neurons. Two-way  
132 ANOVA analyses showed a significant effect of age ( $F_{(1,65)}=30.78$ ,  $p<0.0001$ ) and brain area ( $F_{(1,65)}=13.85$   
133  $p<0.0001$ ). Post-hoc analysis showed that the sIPSC amplitude (pA) was significantly increased at P20 compared  
134 to P10 in BC (Tukey's test,  $p<0.0001$ ) but not in mPFC (Tukey's test,  $p=0.63$ ). The sIPSC amplitude was  
135 significantly decreased at P20 in mPFC compared to BC (Tukey's test,  $p<0.0001$ ) but not at P10 between areas  
136 (Tukey's test,  $p=0.9993$ ), ( $n=9-13$  cells from 5-9 mice/age group).

137 **(d)** Bar graph showing the sIPSC decay time constant ( $\tau_m$ ) at P10 to P20 of mPFC and BC pyramidal neurons.  
138 Two-way ANOVA analyses did not show any significant effect of age ( $F_{(1,45)}=0.11$ ,  $p=0.73$ ) or brain area ( $F_{(1,45)}=$   
139  $0.96$ ,  $p=0.33$ ) was found ( $n=9-13$  cells from 5-9 mice/age group).

140 **(e)** Representative traces of spontaneous excitatory postsynaptic currents (sEPSCs) from layer II/III mPFC (left)  
141 and BC (right) pyramidal neurons at P10 (green) and P20 (black).

142 **(f)** Bar graph showing the sEPSC frequency at P10 to P20 of mPFC and BC pyramidal neurons. Two-way ANOVA  
143 analyses showed a significant effect of age ( $F_{(1,68)}=26.8$ ,  $p<0.0001$ ) and brain area ( $F_{(1,68)}=10.82$ ,  $p=0.0016$ ). Post-  
144 hoc analysis showed that the sEPSCs frequency significantly decreased at P20 compared to P10 in mPFC (Tukey's  
145 test,  $p=0.0112$ ) and BC (Tukey's test,  $p=0.0009$ ). Comparison of the two brain areas at P10, the sEPSCs frequency  
146 was significantly decreased in mPFC compared to BC (Tukey's test,  $p=0.0250$ ), ( $n=9-13$  cells from 5-9 mice/age  
147 group).

148 **(g)** Bar graph showing the sEPSCs peak amplitude at P10 to P20 of mPFC and BC pyramidal neurons. Two-way  
149 ANOVA analyses showed a significant effect of brain area ( $F_{(1,73)}=42.7$ ,  $p<0.0001$ ) but not of age ( $F_{(1,73)}=3.435$ ,  
150  $p=0.067$ ). The sEPSC amplitude was not significantly different at P10 and P20 in mPFC (Tukey's test,  $p=0.1918$ )  
151 and BC (Tukey's test,  $p=0.8617$ ). On the other hand, the sEPSC amplitude was significantly decreased in mPFC  
152 compared to BC at P10 and P20 (Tukey's test,  $p<0.0001$ ) ( $n=9-13$  cells from 5-9 mice/age group).

153 **(h)** Bar graph showing the sEPSCs decay time constant ( $\tau_m$ ) at P10 to P20 of mPFC and BC pyramidal neurons.  
154 Two-way ANOVA analyses showed no significant effect of age ( $F_{(1,57)}=0.22$ ,  $p=0.27$ ) or brain area ( $F_{(1,57)}=0.77$ ,  
155  $p=0.39$ ) ( $n=9-13$  cells from 5-9 mice/age group).

156

157 **Passive and active membrane properties of MGE-derived interneurons are altered in the**  
158 **mPFC across development**

159 Changes in interneuron properties could underlie the increased sIPSC frequency. To  
160 investigate this, we performed current-clamp recordings from layer II/III mPFC and BC of  
161 Lhx6<sup>+</sup> interneurons. For this reason, Lhx6-cre;ROSA26fl-STOP-fl-YFP mice were used in which  
162 Lhx6<sup>+</sup> interneurons express YFP. Lhx6 is expressed by all post-mitotic and mature MGE-  
163 derived interneurons<sup>37</sup>, therefore, YFP is expressed in MGE-derived interneurons, which  
164 include interneurons that express parvalbumin (PV<sup>+</sup>) and somatostatin (SST<sup>+</sup>).

165 Upon analysis of the passive properties, we found a significant decrease in the input  
166 resistance, a significant increase in the membrane capacitance and a trend towards decrease  
167 of the membrane time constant in the mPFC at P20 compared to P10, but no difference in  
168 the resting membrane potential (RMP) (**Figure 3, Table 1**). Compared to BC, the input  
169 resistance and membrane time constant were significantly higher in mPFC, at P10 (**Figure 3,**  
170 **Table 1**).

171 With regard to the active properties, the rate of rise (dv/dt) was significantly  
172 increased, while the duration of AP (half-width) was significantly reduced at P20 compared to  
173 P10 in mPFC (**Figure 4b-c, Table 1**). On the other hand, the amplitude, the rheobase, the  
174 threshold of the AP and the amplitude and time of AHP were not different between P10 to  
175 P20, in the mPFC (**Figure 4a,d-g, Table 1**). Compared to BC at P10, we observed that the AP  
176 amplitude was significantly increased (**Figure 4a, Table 1**), while AHP amplitude was  
177 significantly decreased in the mPFC (**Figure 4f, Table 1**). The increased rate of rise and the  
178 decreased AP duration are possibly linked with the up-regulation of voltage-dependent  
179 sodium channels during development<sup>38</sup>, and in combination with the reduced AHP amplitude  
180 suggest that the PFC MGE-interneurons at P10 are still quite immature, when compared with  
181 adult PV<sup>+</sup>/SST<sup>+</sup> interneurons in mPFC<sup>39,40</sup>.

182 Overall, these data indicate that some intrinsic properties of interneurons in mPFC are  
183 regulated by age (from P10 to P20) reaching values that closer resemble adult MGE-derived  
184 interneurons<sup>39,40</sup>. Therefore, the increased sIPSC frequency of mPFC pyramidal neurons  
185 observed at P20, compared to P10 could partly be explained by these altered properties of  
186 presynaptic interneurons.

187

### Figure 3

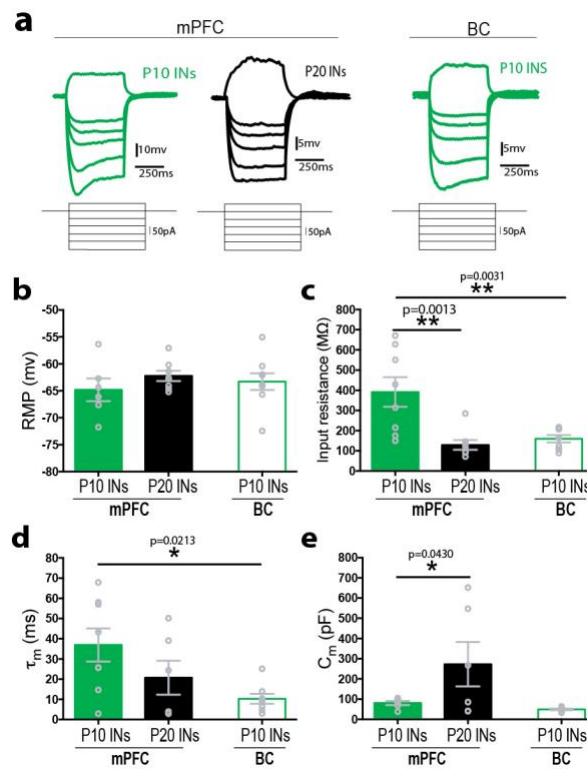

188

189

190 **Figure 3. Passive membrane properties of Lhx6+ interneurons at P10 and P20 mPFC and P10 BC.**

191 **(a)** Representative voltage responses (top traces) to 500ms positive and negative current pulses (bottom  
 192 traces, +50, -50, -70, -100, -150, -200 pA) in mPFC at P10 and P20 and BC at P10 of Lhx6+ fluorescent interneurons  
 193 from layer II/III.

194 **(b)** Bar graph showing the resting membrane potential (RMP) of interneurons at P10 and P20 in mPFC and at  
 195 P10 in BC. One-way ANOVA analyses showed no significant effect among groups ( $F_{(2, 20)} = 0.65$ ,  $p=0.5340$ ), ( $n=6$ -  
 196  $9$  cells from 5-6 mice/age group).

197 **(c)** Bar graph showing the input resistance of interneurons at P10 and P20 in mPFC and at P10 in BC. One-way  
 198 ANOVA analyses showed significant effect among groups ( $F_{(2, 22)} = 10.25$ ,  $p=0.0007$ ). Post-hoc analysis showed  
 199 that the input resistance significantly decreased at P20 compared to P10 in mPFC (Tukey's test,  $p=0.0013$ ) and  
 200 was significantly higher in mPFC compared with BC, at P10 (Tukey's test,  $p=0.0031$ ), ( $n=8$ -9 cells from 5-6  
 201 mice/age group).

202 **(d)** Bar graph showing the membrane time constant ( $\tau_m$ ) of interneurons at P10 and P20 in mPFC and at P10  
 203 in BC. One-way ANOVA analyses showed significant effect among groups ( $F_{(2, 19)} = 4.41$ ,  $p=0.026$ ). Post-hoc  
 204 analysis showed that  $\tau_m$  was not significantly altered at P20 compared to P20 in mPFC (Tukey's test,  $p=0.24$ )  
 205 while it was significantly higher in mPFC compared to BC, at P10 (Tukey's test,  $p=0.021$ ), ( $n=8$ -9 cells from 5-6  
 206 mice/age group).

207 **(e)** Bar graph showing the membrane capacitance ( $C_m$ ) of interneurons at P10 and P20 in mPFC and at P10 in  
 208 BC. One-way ANOVA analyses showed significant effect among groups ( $F_{(2, 16)} = 4.0$ ,  $p=0.03$ ). Post-hoc analysis



209 showed that Cm was significantly higher at P10 compared with P20 in mPFC (LSD test,  $p=0.04$ ) and was not  
 210 significantly different between mPFC and BC, at P10 (LSD test,  $p=0.7$ ), ( $n=6-9$  cells from 5-6 mice/age group).  
 211

**Figure 4**

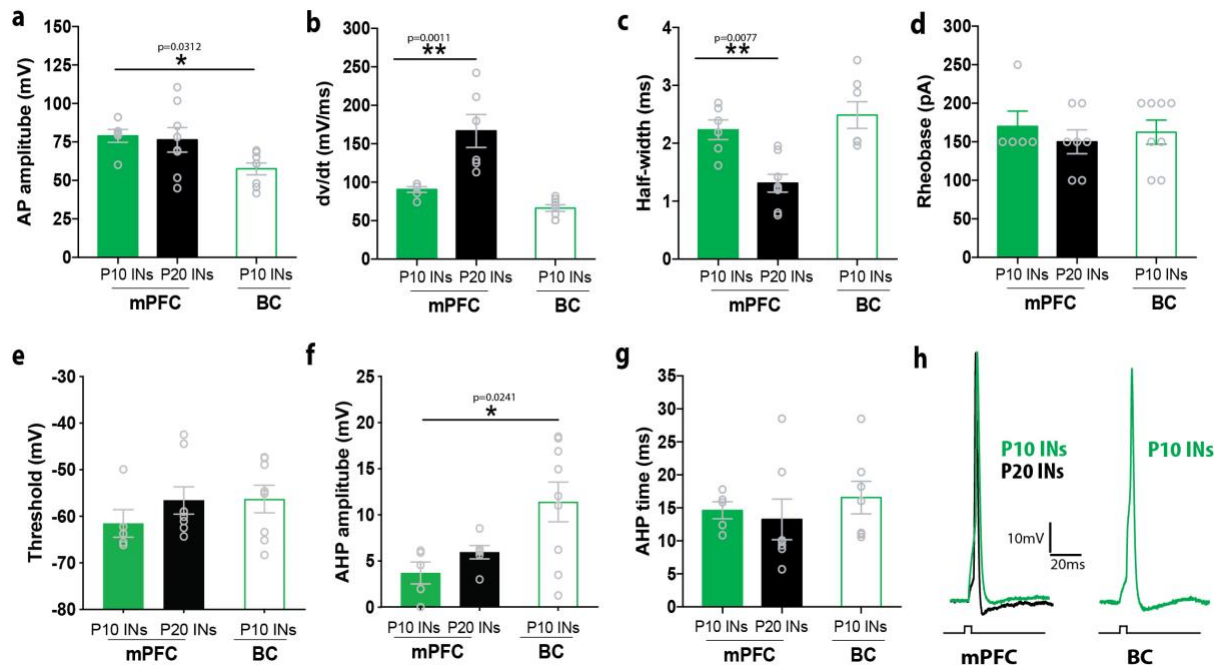

212

213 **Figure 4. Poor development of active membrane properties of Lhx6+ interneurons in mPFC.**

214 **(a)** Bar graph showing the action potential (AP) amplitude of interneurons at P10 and P20 in mPFC and at P10  
 215 in BC. One-way ANOVA analyses showed significant effect among groups ( $F_{(2,19)}=3.93$ ,  $p=0.037$ ). Post-hoc analysis  
 216 showed that the AP amplitude was not significantly different at P20 compared to P10 in mPFC (Tukey's test,  $p=$   
 217  $0.76$ ). Compared to BC, the AP amplitude was significantly higher in mPFC at P10 (Tukey's test,  $p=0.03$ ), ( $n=6-9$   
 218 cells from 5-6 mice/age group).

219 **(b)** Bar graph showing the AP rate of rise ( $dv/dt$ ) of interneurons at P10 and P20 in mPFC and at P10 in BC.  
 220 One-way ANOVA analyses showed significant effect among groups ( $F_{(2,17)}=20.03$ ,  $p<0.0001$ ). Post-hoc analysis  
 221 showed that the AP rate of rise significantly increased at P20 compared to P10 in mPFC (Tukey's test,  $p=0.0011$ )  
 222 and was not significantly different in mPFC compared to BC, at P10 (Tukey's test,  $p=0.3$ ), ( $n=6-9$  cells from 5-6  
 223 mice/age group).

224 **(c)** Bar graph showing the AP duration (half-width) of interneurons at P10 and P20 in mPFC and at P10 in BC.  
 225 One-way ANOVA analyses showed significant effect among groups ( $F_{(2,18)}=11.69$ ,  $p=0.0006$ ). Post-hoc analysis  
 226 showed that the AP duration significantly decreased at P20 compared to P10 in mPFC (Tukey's test,  $p=0.0077$ )  
 227 and was not significantly different between mPFC and BC, at P10 (Tukey's test,  $p=0.64$ ), ( $n=6-9$  cells from 5-6  
 228 mice/age group).

229 **(d)** Bar graph showing the AP rheobase of interneurons at P10 and P20 in mPFC and at P10 in BC. One-way  
 230 ANOVA analyses showed no significant effect among groups ( $F_{(2,17)}=0.33$ ,  $p=0.7$ ), ( $n=6-9$  cells from 5-6 mice/age  
 231 group,  $p=0.7$ ).

232 **(e)** Bar graph showing the AP threshold of interneurons at P10 and P20 in mPFC and at P10 in BC. One-way  
233 ANOVA analyses showed no significant effect among groups ( $F_{(2,18)} = 0.7722$ ,  $p=0.4767$ ), (n=6-9 cells from 5-6  
234 mice/age group).

235 **(f)** Bar graph showing the AHP (afterhyperpolarization) amplitude of interneurons at P10 and P20 in mPFC and at  
236 P10 in BC. One-way ANOVA analyses showed significant effect among groups ( $F_{(2,17)} = 4.984$ ,  $p=0.0198$ ). Post-  
237 hoc analysis showed that the AHP amplitude was not significantly different at P20 compared to P10 in mPFC  
238 (Tukey's test,  $p=0.7167$ ) and was significantly decreased in mPFC compared to BC, at P10 (Tukey's test,  $p=$   
239  $0.0241$ ), (n=6-9 cells from 5-6 mice/age group).

240 **(g)** Bar graph showing the AHP time of interneurons at P10 and P20 in mPFC and at P10 in BC. One-way ANOVA  
241 analyses showed no significant effect among groups ( $F_{(2,16)}=0.45$ ,  $p=0.64$ ), (n=6-9 cells from 5-6 mice/age group).

242 **(h)** Representative traces of APs of layer II/III Lhx6<sup>+</sup> interneurons in mPFC (left) and BC (right) at P10 (green)  
243 and P20 (black).

244

#### 245 **The emergence of PV immunoreactivity is delayed in mPFC compared to BC**

246 An additional explanation for the increased sIPSC frequency could come from  
247 alterations in interneuron cell densities. To test this, we quantified the number of  
248 interneurons per area in cryosections at P10 and P20 mPFC and BC coronal brain slices of  
249 Lhx6<sup>+</sup>-expressing mice. In these, Lhx6<sup>+</sup> interneurons express YFP. The YFP<sup>+</sup> positive cells per  
250 area (i.e. Lhx6<sup>+</sup> cell density) in mPFC and BC was similar between ages, but was significantly  
251 reduced in the mPFC, compared to BC (**Figure 5a**).

252 The transcription factor Lhx6 is required for the specification and maintenance of main  
253 MGE-derived interneurons, PV and SST-positive interneuron subtypes, at postnatal ages<sup>37</sup>.  
254 The neuropeptide SST (both mRNA and protein) is progressively expressed from embryonic  
255 to postnatal levels<sup>41,42</sup>. We found that the SST mRNA levels were similar between areas and  
256 ages (**Figure 5b**). On the other hand, the emergence of PV immunoreactivity in the mouse  
257 cortex shows a delayed development, starting from early postnatal period to adult, with  
258 marked area-specific differences<sup>43</sup>. We found that PV was only immunoreactive in BC, and  
259 not in mPFC, at P10 (**Figure 5c and Supplementary Figure 1**). At P20, PV was immunoreactive  
260 in both mPFC and BC, but PV<sup>+</sup> cell density was significantly lower in the mPFC, compared to  
261 BC (**Figure 5c and Supplementary Figure 1**). Overall, the densities of Lhx6<sup>+</sup> and PV<sup>+</sup> cells are  
262 lower in the mPFC compared to BC, while SST<sup>+</sup> is not altered (**Supplementary Figure 2**).

263 We also counted the total cell density of mPFC and BC from neonatal and juvenile  
264 mice (**Supplementary Figure 3a**) using Nissl staining. In the mPFC the cell density significantly  
265 decreased at P20 compared to P10 (**Supplementary Figure 3b**). On the contrary, in BC, the

266 total cell density significantly increased at P20 compared to P10 (**Supplementary Figure 3b**)  
267 When the two brain areas were compared, no difference was found at P10, while the mPFC  
268 cell density was significantly decreased compared to BC at P20 (**Supplementary Figure 3b**).

269 We further examined whether the alterations in total cell density are derived from  
270 alterations in cell density of interneurons by measuring the Lhx6<sup>+</sup> neurons over the Nissl-  
271 positive cells. No differences were detected between areas and ages (**Supplementary Figure**  
272 **3c**) suggesting that the changes in total cell density in mPFC and BC respectively are probably  
273 due to changes in other neuronal or glial populations.

## Figure 5

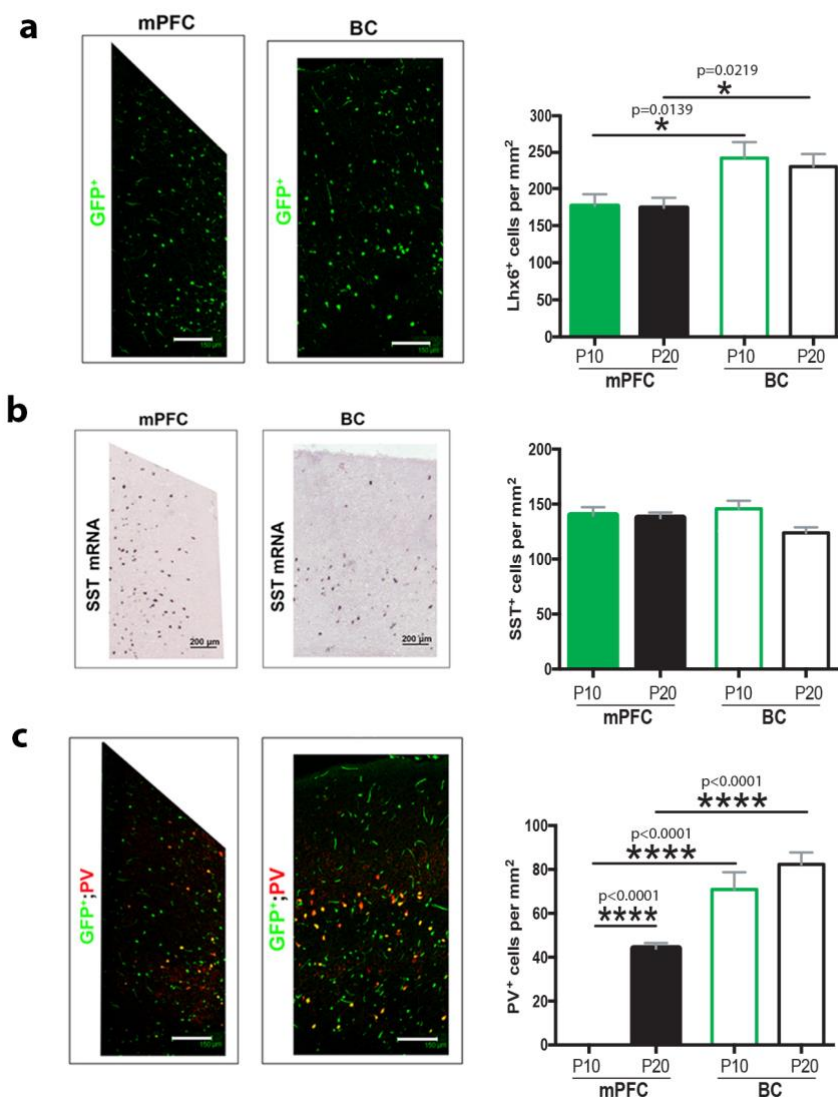

274

275 **Figure 5. Significant differences in cellular density of Lhx6<sup>+</sup> interneurons in mPFC and BC at P10 and P20.**

276 **(a)** A representative immunostaining with GFP for Lhx6<sup>+</sup> interneurons in Lhx6-cre;ROSA26fl-STOPfl-YFP mice  
277 in mPFC and BC at P20 is showing on the left. Scale bars: 150  $\mu$ m. On the right, bar graph comparing Lhx6<sup>+</sup>

278 interneurons cell density (per mm<sup>2</sup>) at P10 and P20 in mPFC and BC. Two-way ANOVA analyses of the cell density  
279 revealed a significant effect of brain area ( $F_{(1, 35)} = 12.47$ ,  $p=0.0012$ ), but not of age ( $F_{(1,35)}=0.1735$ ,  $p=0.6795$ ).  
280 Post-hoc analysis showed that the Lhx6<sup>+</sup> cell density was not significant different at P20 compared to P10 in  
281 mPFC and BC (LSD test,  $p=0.91$  and  $p= 0.63$ , respectively). The Lhx6<sup>+</sup> cell density was significantly lower in mPFC  
282 compared to BC at P10 and P20, respectively (LSD test,  $p=0.01$  and  $p= 0.02$ , respectively), ( $n=10-11$  brain slices  
283 from 4-5 mice/age group).

284 **(b)** A representative in situ hybridization staining for somatostatin positive cells (SST<sup>+</sup>) using wild type animals  
285 in mPFC and BC at P20 is showing on the left. Scale bar: 200 $\mu$ m. Bar graph comparing cell density based on SST<sup>+</sup>  
286 expression at P10 and P20 in mPFC and BC. Two-way ANOVA analyses of the cell density showed no significant  
287 effect of age ( $F_{(1, 56)}= 3.36$ ,  $p=0.07$ ) and brain area ( $F_{(1,56)}=0.29$ ,  $p=0.59$ ) was found, ( $n=12-17$  brain slices from 4-  
288 5 mice/age group).

289 **(c)** A representative double immunostaining for GFP; PV (PV: parvalbumin) in mPFC and BC at P20 is showing  
290 on the left. Scale bars: 150  $\mu$ m. On the right, bar graph comparing cell density based on PV<sup>+</sup> expression at P10  
291 and P20 in mPFC and BC. Two-way ANOVA analyses of the cell density revealed a significant effect of age ( $F_{(1, 18)}$   
292 = 40.06,  $p<0.0001$ ) and brain area ( $F_{(1, 18)} = 156.2$ ,  $p<0.0001$ ). PV<sup>+</sup> cells were not found in mPFC but were identified  
293 in BC, at P10. Post-hoc analysis showed that the PV<sup>+</sup> cell density was not significantly different at P20 compared  
294 to P10 in BC (LSD test,  $p= 0.1089$ ), but was significantly lower in mPFC compared to BC at P20 (LSD test,  
295  $p<0.0001$ ), ( $n=10-11$  brain slices from 4-5 mice/age group).

296

### 297 **GABA is non-inhibitory in the mPFC but not BC of neonatal mice**

298 Our data so far have indicated several similarities in the development of mPFC and BC  
299 from the neonatal to pre-juvenile period, but also an indication for delayed maturation of  
300 several mPFC interneuron properties (intrinsic properties and PV immunoreactivity).  
301 Therefore, it is likely that another GABAergic developmental process is delayed, and  
302 specifically, that of the switch from depolarizing to hyperpolarizing function of GABA<sub>A</sub>R. It is  
303 well known that GABA<sub>A</sub>R is depolarizing during the first postnatal week, but switches to  
304 hyperpolarizing at P7 in the hippocampus, cortex and amygdala<sup>8,12,44-49</sup>. Therefore, at P10,  
305 GABA<sub>A</sub>R function is inhibitory in the barrel cortex. We used diazepam (2 $\mu$ M) (a GABA<sub>A</sub>R  
306 agonist) to enhance GABA<sub>A</sub>R function and determine whether it is depolarizing by measuring  
307 the fEPSP response. At P10, diazepam did not significantly alter the fEPSP in BC, as expected  
308 if GABA<sub>A</sub>R function is inhibitory. However, diazepam increased the fEPSP amplitude in mPFC  
309 at P10 (**Figure 6a-b**). At P20, the fEPSP amplitude was not significantly altered following  
310 diazepam application in both mPFC and BC (**Figure 6c,d**). These results suggest that the  
311 GABA<sub>A</sub>R function is depolarizing in the mPFC at P10.

312 The switch in the GABA<sub>A</sub>R function from depolarizing to hyperpolarizing occurs due to  
313 the increased expression of the K<sup>+</sup>-Cl<sup>-</sup> co-transporter 2 (KCC2)<sup>50</sup>. Therefore, we measured  
314 KCC2 protein levels and demonstrated that they were significantly increased at P20 compared  
315 to P10 in the mPFC but not in the BC (**Figure 7a,b**). These results further support our  
316 hypothesis that the GABA<sub>A</sub>R function is depolarizing at P10 in the mPFC and could explain the  
317 observed increased fEPSPs and decreased sIPSCs.

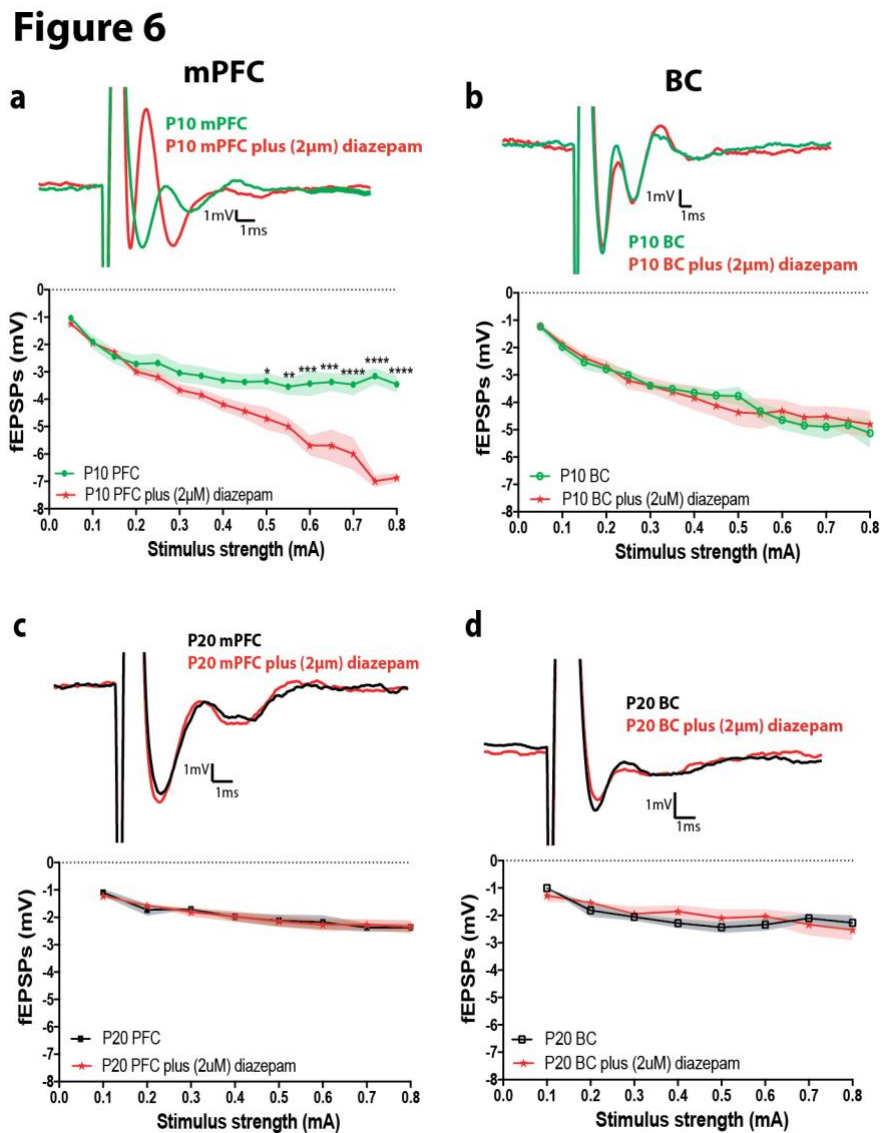

318 **Figure 6. Increased GABA<sub>A</sub>R activity leads to enhanced fEPSPs in mPFC during the second postnatal week.**  
319 fEPSPs were recorded in layer II/III in response to current pulses of increasing stimulus strength  
320 of layer II/III, during two experimental treatments, before and after application of 2 μM diazepam (GABA<sub>A</sub>R  
321 agonist) at P10 and P20 of mPFC and BC in mice.  
322 (a) Representative traces (left) and graph (right) showing the fEPSPs amplitude before (green) and after (red)  
323 diazepam bath application, in mPFC at P10. Two-way repeated measures ANOVA analyses of evoked fEPSPs  
324 revealed significant effect of stimulus strength ( $F_{(15,135)} = 25.64$ ,  $p < 0.0001$ ) and experimental treatments ( $F_{(1, 135)}$   
325

326 = 136.1,  $p < 0.0001$ ). Post-hoc analysis showed that the fEPSP amplitude significantly increased in mPFC at P10  
327 after diazepam bath application (Sidak's test,  $*p = 0.0175$ ,  $**p = 0.0082$ ,  $***p = 0.0002$  and  $****p < 0.0001$  at 0.3,  
328 0.4, 0.5, 0.6 and 0.7 mA respectively), ( $n = 6-7$  brain slices from 3-4 mice).

329 **(b)** Graph (right) and representative traces (left) showing that diazepam bath application does not have any  
330 effect on the fEPSP amplitude in BC at P10. Two-way repeated measures ANOVA analyses of evoked fEPSPs  
331 revealed a significant effect of stimulus strength ( $F(15, 140) = 24.05$ ,  $p < 0.0001$ ) but not experimental conditions  
332 ( $F_{(1, 135)} = 0.03$ ,  $p = 0.86$ ), ( $n = 6-7$  brain slices from 3-4 mice).

333 **(c)** Graph (right) and representative traces (left) showing that diazepam bath application does not have any  
334 effect on the fEPSP amplitude in mPFC at P20. Two-way repeated measures ANOVA analyses of evoked fEPSPs  
335 revealed a significant effect of stimulus strength ( $F_{(7, 96)} = 10.36$ ,  $p < 0.0001$ ) but not experimental conditions  
336 ( $F_{(1, 96)} = 0.03$ ,  $p = 0.9382$ ), ( $n = 6-7$  brain slices from 3-4 mice).

337 **(d)** Graph (right) and representative traces (left) showing that bath application of diazepam does not have any  
338 effect in the fEPSP amplitude in BC at P20. Two-way repeated measures ANOVA analyses of evoked fEPSPs  
339 revealed a significant effect of stimulus strength ( $F_{(7, 96)} = 5.51$ ,  $p < 0.0001$ ) but not experimental conditions ( $F_{(1, 96)}$   
340  $= 0.50$ ,  $p = 0.47$ ), ( $n = 6-7$  brain slices from 3-4 mice).

341

## Figure 7

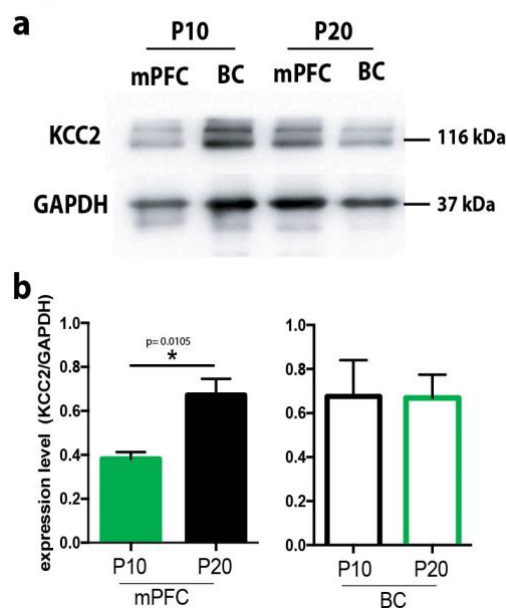

342

343 **Figure 7. Decreased levels of K+-Cl- co-transporter 2 (KCC2) in mPFC during the second postnatal week.**

344 **(a)** Representative blots showing changes of the K-Cl co-transporter (KCC2) levels, relative to GAPDH at P10  
345 and P20 in mPFC and BC.

346 **(b)** Graph showing the normalized protein level (KCC2/GAPDH) in mPFC and BC at P10 and P20. The KCC2  
347 protein levels was significantly increased at P20 compared to P10 in mPFC (two-tailed t-test,  $p = 0.01$ ) but not in  
348 BC (two-tailed t-test,  $p = 0.97$ ) ( $n = 3-4$  mice).

349

350 **No significant changes in pyramidal neuron excitability**

351 To determine whether the reduced sEPSC frequency can be explained by changes in  
352 pyramidal neuron excitability, we investigated their intrinsic properties. The passive and  
353 active properties of these neurons were measured using current-clamp recordings from layer  
354 II/III mPFC and BC pyramidal neurons. With regards to passive properties, no significant  
355 differences were observed in the RMP, the input resistance and the membrane time constant  
356 between brain regions and ages (**Supplementary Figure 4, Table 1**). Only the membrane  
357 capacitance was significantly increased at P20 compared to P10 (**Supplementary Figure 4d,**  
358 **Table 1**), in both brain areas. In addition, the number of spikes generated with increasing  
359 current stimulation was not significantly different between ages and regions (**Supplementary**  
360 **Figure 5**).

361 In terms of active properties, the AP amplitude and rate of rise were increased at P20  
362 compared to P10 mPFC, while the AP half-width, rheobase and threshold were not  
363 significantly different (**Figure 8, Table 1**). The AP amplitude was also significantly increased at  
364 P20, compared to P10 in BC, while the other properties did not change (**Figure 8, Table 1**).  
365 Comparing the two regions at the two ages, we found no significant differences of AP  
366 properties of pyramidal neurons (**Figure 8, Table 1**). The developmental increase of AP  
367 amplitude and rate of rise in the mPFC could be due to the on-going maturation of sodium  
368 channels in pyramidal neurons. However, these changes could not account for the reduced  
369 sEPSCs in the neonatal, compared to pre-juvenile, mPFC and BC.

370

## Figure 8

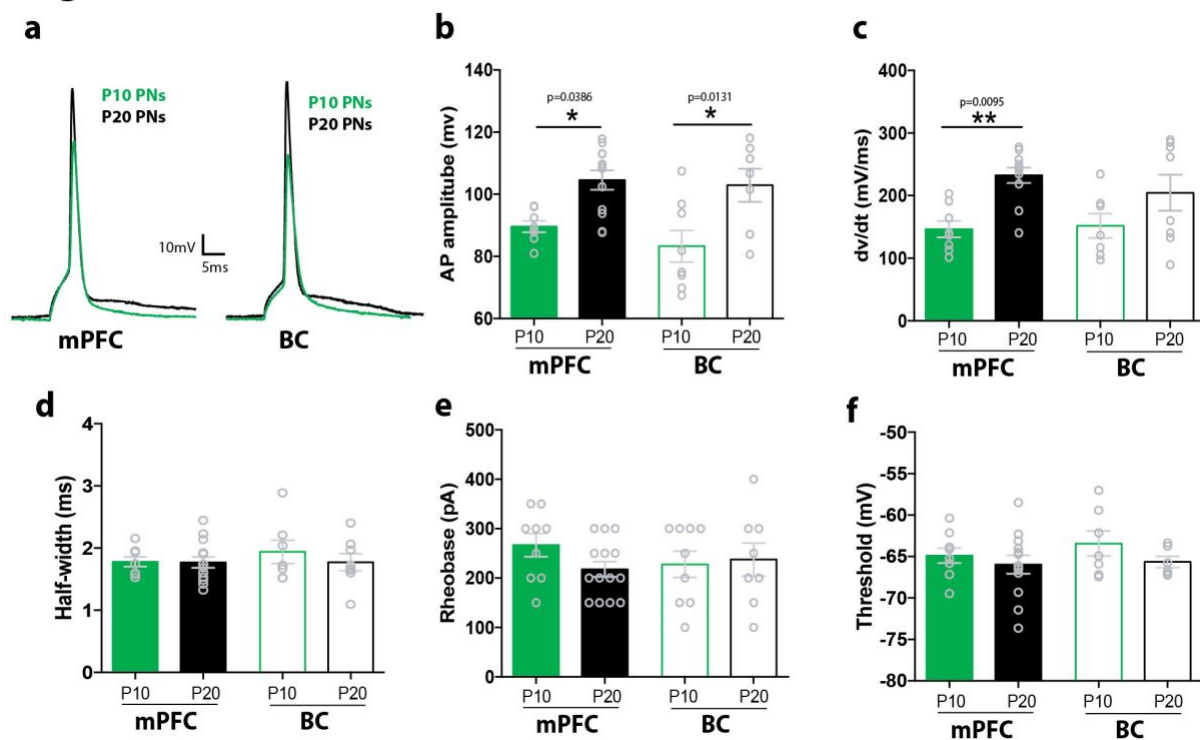

371

372 **Figure 8. Active properties of mPFC and BC pyramidal neurons.**

373 **(a)** Representative traces of action potentials (APs) of layer II/III pyramidal neurons in mPFC (left) and BC (right)  
 374 at P10 (green) and P20 (black), respectively.

375 **(b)** Bar graph showing the AP amplitude of pyramidal neurons at P10 and P20 in mPFC and BC. Two-way  
 376 ANOVA analyses showed a significant effect of age ( $F_{(1,31)} = 18.74, p=0.0001$ ) but not on brain area ( $F_{(1,31)} = 0.99,$   
 377  $p=0.32$ ) was found. Post-hoc analysis showed that the AP amplitude significantly increased at P20 compared to  
 378 P10 in mPFC and BC (Tukey's test,  $p=0.0386$  and  $p=0.0131$ , respectively) ( $n=9-14$  cells from 6-10 mice/age  
 379 group).

380 **(c)** Bar graph showing the AP rate of rise (dv/dt) of pyramidal neuron at P10 and P20 in mPFC and BC. Two-  
 381 way ANOVA analyses showed a significant effect of age ( $F_{(1,30)} = 13.53, p=0.0009$ ) but not on brain area ( $F_{(1,30)} =$   
 382  $0.36, p=0.55$ ) was found. Post-hoc analysis showed that the AP rate of rise significantly increased at P20  
 383 compared to P10 in mPFC (Tukey's test,  $p=0.0095$ ), but not in BC (Tukey's test,  $p=0.25$ ) ( $n=8-14$  cells from 6-10  
 384 mice/age group).

385 **(d)** Bar graph showing the AP duration (half-width) of pyramidal neuron at P10 and P20 in mPFC and BC. Two-  
 386 way ANOVA analyses showed no significant effect of age ( $F_{(1,33)} = 0.52, p=0.47$ ) or brain area ( $F_{(1,33)} = 0.43,$   
 387  $p=0.51$ ) was found ( $n=9-14$  cells from 6-10 mice/age group).

388 **(e)** Bar graph showing the AP rheobase of pyramidal neuron at P10 and P20 in mPFC and BC. Two-way ANOVA  
 389 analyses showed no significant effect of age ( $F_{(1,36)} = 0.66, p=0.41$ ) or brain area ( $F_{(1,36)} = 0.16, p=0.69$ ) was found  
 390 ( $n=9-14$  cells from 6-10 mice/age group).



391 **(f)** Bar graph showing the AP threshold of pyramidal neuron at P10 and P20 in mPFC and BC. Two-way ANOVA  
392 analyses showed no significant effect of age ( $F_{(1,31)} = 1.90$ ,  $p=0.17$ ) or brain area ( $F_{(1,31)}=0.55$ ,  $p=0.46$ ) was found  
393 ( $n=9-14$  cells from 6-10 mice/age group).

394

### 395 **Increased firing activity *in vivo* in the mPFC between the second and third postnatal weeks**

396 To investigate the physiological network activity *in vivo*, multisite recordings of the  
397 LFP and multi-unit activity (MUA) were performed in layers II/III of mPFC at P8-10 and P20-  
398 23. A significant increase of MUA was identified at P22 compared to P9 mice, indicating a  
399 developmental increased spiking activity in layers II/III of mPFC on the third compared to the  
400 second postnatal week. These results corroborate the increased AP amplitude and rate-of-  
401 rise of P20 mPFC pyramidal neurons (**Figure 9, Table 1**) and provide further evidence that the  
402 decreased synaptic activity of mPFC circuits cannot be attributed to increased spiking activity  
403 of mPFC neurons at P10.

## Figure 9

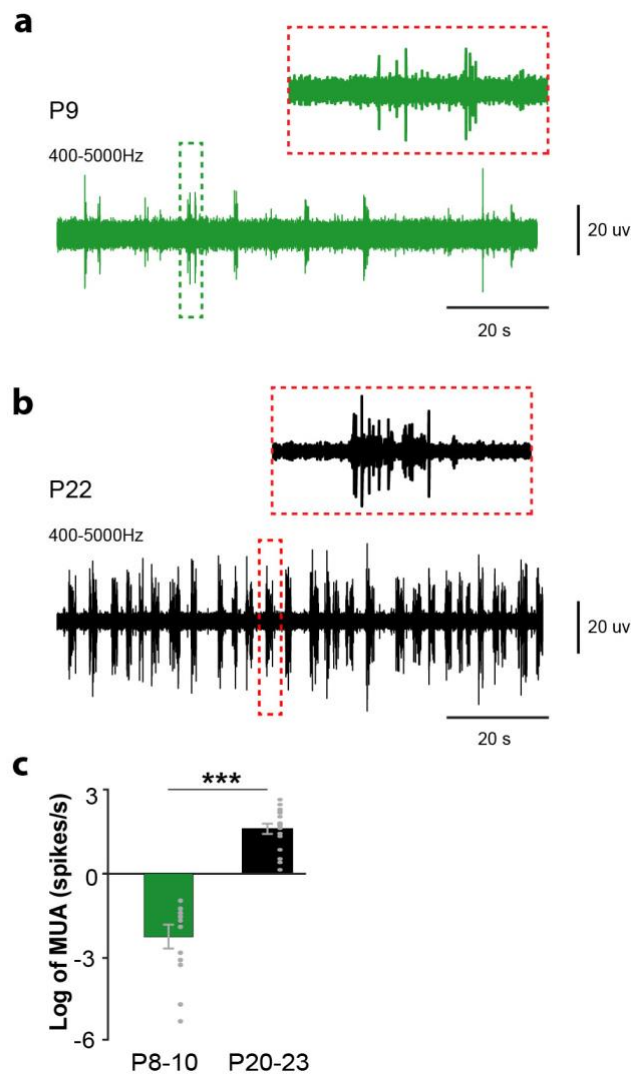

404

405 **Figure 9. Spike activity in PFC of neonatal and pre-juvenile mice.**

406 (a) Example of spike activity in PFC of a P9 mouse. The trace is extracellular LFP recordings after bandpass (500  
407 -5000 Hz) filtering.

408 (b) the same display as (a), but in one P22 mouse.

409 (c) Bar diagram displaying the mean MUA of neurons in PFC of neonatal and pre-juvenile mice. During  
410 development, significant increase of MUA in PFC in pre-juvenile mice (n=14) compared with in neonatal mice  
411 (n=13) ( $1.71 \pm 0.16$  vs.  $-2.29 \pm 0.45$ ,  $p < 0.0001$ , One way ANOVA,  $F_{(1, 25)} = 80.19$ ).

412

## 413 Discussion

414 Our study has identified significant developmental events in the mPFC and the BC  
415 between the second and third postnatal weeks. Specifically, we have shown that the basal  
416 synaptic transmission decreases from the second to the third postnatal week, a fact that can  
417 be explained by a concurrent decrease in the sEPSCs and an increase in the sIPSCs in both

418 mPFC and BC. Moreover, our data support a depolarizing action of GABA<sub>A</sub>R in the second  
419 postnatal week, in the mPFC only, as indicated by increased basal synaptic transmission  
420 following GABA<sub>A</sub>R activation and decreased protein levels of KCC2. In parallel, the intrinsic  
421 properties of both interneurons and pyramidal cells change with age and relate to augmented  
422 network activity across development.

423

#### 424 **Depolarizing GABA**

425 GABA plays a crucial role in inhibiting adult neurons, acting primarily via the chloride-  
426 permeable GABA<sub>A</sub>R and resulting in hyperpolarization of the membrane potential<sup>51</sup>.  
427 However, GABA action leads to depolarization of immature neurons (i.e. during the first  
428 postnatal week in mice), due to an initially higher intracellular chloride concentration  $[Cl^-]_{in}$ <sup>10-</sup>  
429 <sup>12</sup>. The developmental switch of GABA action from depolarizing to hyperpolarizing results  
430 from changes in cation-chloride co-transporter expression: NKCC1), a cation-Cl<sup>-</sup> importer, is  
431 highly expressed in neuronal precursor cells during early brain development<sup>52,53</sup>, while the  
432 expression of the K<sup>+</sup>-Cl<sup>-</sup> cotransporter 2 (KCC2), a cation-Cl<sup>-</sup> exporter, increases after the first  
433 postnatal week<sup>10-12</sup>. This increased KCC2 transporter expression might provide a central  
434 mechanism for the depolarization to hyperpolarization switch of GABAergic transmission via  
435 progressive reduction of  $[Cl^-]_{in}$ <sup>13,50,54-57</sup>.

436 The GABA<sub>A</sub>R switch from depolarizing to hyperpolarizing occurs at P7 in the  
437 hippocampus, cortex, amygdala<sup>12,44-49</sup>. Our study suggests that this switch is delayed in the  
438 mPFC compared to primary somatosensory cortex and it takes place between P10 and P20.  
439 Specifically, we show that increased GABA<sub>A</sub>R activity leads to enhanced fEPSPs in neonatal  
440 mPFC (P10), suggesting that the GABA<sub>A</sub>R function is depolarizing in the mPFC at P10. This  
441 hypothesis is further supported by decreased levels of KCC2 transporter in the neonatal  
442 mPFC. Our results could have implications for understanding the delayed maturation of mPFC  
443 compared to other cortical areas, which may depend on a combination of a delayed switch  
444 from depolarizing-to-hyperpolarizing function of GABA<sub>A</sub>R and maturation of interneurons.

445

#### 446 **Interneurons and mPFC development**

447 Recordings of Lhx6<sup>+</sup>- interneurons indicate that both passive and active properties are  
448 regulated by age and reach values that better resemble adult MGE-derived interneurons.  
449 Specifically, we have found that the input resistance and AP width decrease while the AP rate

450 of rise increases in the mPFC at P20 compared to P10. In part, similar findings have been  
451 identified for PV<sup>+</sup> cells in the hippocampus<sup>58,59</sup> and SST<sup>+</sup> cells in the anterior cingulate cortex<sup>39</sup>.  
452 On the other hand, the AHP amplitude is still quite immature in the mPFC at P20, compared  
453 to PV<sup>+</sup>, SST<sup>+</sup> interneurons in primary sensory areas or the hippocampus and compared to adult  
454 mPFC<sup>39,40,58</sup>. Therefore, it is likely that the physiological properties of PV<sup>+</sup> and SST<sup>+</sup>  
455 interneurons in the mPFC continue to change past the third postnatal week.

456 Our knowledge on the neonatal physiology of mPFC is very limited. It has been shown  
457 that PV expression is lowest in juveniles and increases during adolescence to levels similar to  
458 those observed in adulthood<sup>60</sup>. Furthermore, PV expression is not evident in the neonatal  
459 period and emerges during the pre-juvenile period in the mPFC<sup>61-64</sup>. Our results agree with  
460 these findings, as PV expression was detected during the pre-juvenile period in the mPFC.  
461 Dysfunction of PV<sup>+</sup> interneurons is sufficient to result in behavioural (and other) changes  
462 similar to those observed in a range of psychiatric disorders<sup>65</sup>.

463 In addition, our study has identified decreased excitatory and increased inhibitory  
464 synaptic function between the second and third postnatal weeks. We show that the  
465 frequency of sIPSCs in layer II/III pyramidal cells of mPFC increases from neonatal to pre-  
466 juvenile period, consistent with the developmental trajectory of IPSCs in layer III pyramidal  
467 neurons of monkey PFC<sup>66</sup> and mouse mPFC<sup>67</sup>.

468

### 469 **Pyramidal neurons and network activity**

470 It has been suggested that spontaneous network activity changes from local, highly  
471 synchronized to more diffuse from the second to the third postnatal weeks, in the primary  
472 sensory cortices<sup>68,69</sup>. Oscillatory activity in the mPFC first emerges at P15<sup>70</sup>. In this study, we  
473 have found increased spiking activity in the mPFC during the third, compared to the second  
474 postnatal week. This occurred despite the decreased excitatory and increased inhibitory  
475 synaptic function, but could be explained partly by the developmental increase of AP  
476 amplitude and rate of rise in the mPFC layer II/III pyramidal neurons, which could be due to  
477 the on-going maturation of sodium channels in pyramidal neurons.

478 Studies in developing mPFC pyramidal neurons have proposed that there is a unique  
479 sensitive time window for synaptic maturation of these neurons from individual cortical  
480 layers. During rat mPFC layer V development, the intrinsic properties, synaptic inputs and

481 morphology of pyramidal neurons develop together during early postnatal life. While the  
482 greatest changes were reported during the first ten days after birth, the adult-like properties  
483 emerged after the end of the third week (P21)<sup>71</sup>. This study confirms that the second  
484 postnatal week is a period of rapid growth, similar to that in other neocortical regions by  
485 combining functional and structural measurements of developing pyramidal neurons in  
486 mouse mPFC<sup>72,73</sup>.

487

### 488 **Developmental PFC malformation leads to cognitive disorders in adulthood**

489 The neonatal functional maturation of GABAergic circuits and E/I (excitation to  
490 inhibition) balance are critical for PFC-dependent behaviours and plasticity in the adult while  
491 their malfunction leads to many psychiatric disorders<sup>65,74,75</sup>. From the prenatal period to late  
492 adolescence, the PFC network is highly vulnerable to genetic and environmental factors<sup>76</sup>,  
493 since the mPFC is one of latest cortical regions to develop<sup>77</sup>. While many studies have focused  
494 on understanding several developmental processes during adolescence<sup>78</sup>, our knowledge  
495 regarding the cellular and network developmental processes during the perinatal period is  
496 significantly limited, despite significant evidence showing that environmental manipulations  
497 during this period manifest as complex psychiatric and neurologic disorders in adulthood<sup>79</sup>.

498 The delayed developmental shift of GABA action in various mouse models mimicking  
499 human brain disorders have been investigated, including the maternal immune activation  
500 model<sup>80,81</sup>, the Scn1a and Scn1b mouse models of Dravet syndrome, the 22q11.2 deletion  
501 syndrome<sup>82,83</sup> and the Fmr1 deficient model of fragile X syndrome<sup>84</sup>. In the latter study, early  
502 postnatal correction of GABA depolarization (bumetanide-treated) led to sufficient  
503 normalization of the mature BC network<sup>84</sup>. The impaired KCC2 has been proposed as a  
504 potential therapeutic target of epilepsies by many studies in animal models and human  
505 patients<sup>85</sup>.

506 Our study focuses in understanding the early developmental cellular and physiological  
507 mechanisms of mPFC circuits, before adolescence, and proposes that the neonatal mPFC  
508 compared to BC exhibits a delayed switch from depolarization to hyperpolarization function  
509 of GABA<sub>A</sub>R. Our results raise the possibility that the delayed maturation of mPFC compared  
510 to other cortical areas depends on a combination of a delayed switch from depolarization to  
511 hyperpolarization function of the GABA<sub>A</sub>R and delayed maturation of interneurons.

512

## 513 **Methods**

514 All *in vitro* experiments with mice took place under an experimental protocol  
515 approved by the Research Ethics Committee and by our Institutional Animal Care and Use  
516 Committee that has been approved by the Veterinarian Authorities Office (protocol license  
517 no. 93164). Experiments were carried out by trained scientists and in accordance with the 3R  
518 principles. *In vivo* experiments were performed in compliance with the German laws and the  
519 guidelines of the European Community for the use of animals in research and were approved  
520 by the local ethical committee (015/17, 015/18).

521

## 522 **Animals**

523 The *in vitro* experiments were performed on male C57Bl/6J; Lhx6Tg(Cre); R26R-YFP+/+  
524 mice from animal facility of IMBB-FORTH were used. For the *in vivo* experiments, timed-  
525 pregnant C57Bl/6J mice from the animal facility of the University Medical Center Hamburg-  
526 Eppendorf were used. The day of vaginal plug detection was defined as embryonic day (E)0.5,  
527 whereas the day of birth was defined as P0. The offspring of both sexes are used for *in vivo*  
528 electrophysiology recordings. All procedures were performed according to the European  
529 Union ethical standards outlined in the Council Directive 2010/63EU of the European  
530 Parliament on the protection of animals used for scientific purposes.

531 Mice were housed with their mothers and provided with standard mouse chow and  
532 water ad libitum, under a 12 h light/dark cycle (light on at 7:00 am) with controlled  
533 temperature (21°C). The P10 experimental group includes ages P9-P11 and the P20 group  
534 includes ages P19-P21, also referred to as second and third postnatal weeks or neonatal and  
535 pre-juvenile, respectively. All efforts were made to minimize both the suffering and the  
536 number of animals used.

537

## 538 ***In vitro* extracellular recordings**

539 Slice Preparation: Mice (P10 and P20) were decapitated under halothane anesthesia. The  
540 brain was removed promptly and placed in ice cold, oxygenated (95% O<sub>2</sub> –5% CO<sub>2</sub>) artificial  
541 cerebrospinal fluid (aCSF) containing (in mM): 125 NaCl, 3.5 KCl, 26 NaHCO<sub>3</sub>, 1 MgCl<sub>2</sub> and 10  
542 glucose (pH = 7.4, 315 mOsm/l). The brain was blocked and glued onto the stage of a  
543 vibratome (Leica, VT1000S). Rostrocaudal coronal slices (400 µm thick) containing either the  
544 mPFC (prefrontal cortex) or the BC (barrel cortex) region were selected and transferred to a

545 submerged chamber, which was continuously superfused with oxygenated (95% O<sub>2</sub>–5% CO<sub>2</sub>)  
546 aCSF containing (in mM): 125 NaCl, 3.5 KCl, 26 NaHCO<sub>3</sub>, 2 CaCl<sub>2</sub>, 1 MgCl<sub>2</sub> and 10 glucose (pH  
547 = 7.4, 315 mOsm/l) at room temperature (RT). The slices were allowed to equilibrate for at  
548 least 1 h in this chamber before recordings began. Slices were then transferred to a  
549 submerged recording chamber, continuously superfused with oxygenated (95% O<sub>2</sub>–5% CO<sub>2</sub>)  
550 aCSF (same constitution as the one used for maintenance of brain slices) at RT during  
551 recordings.

552 Data Acquisition: Electrophysiological recordings were performed in all experimental groups  
553 under the same conditions as described below. Pulled glass micropipettes were filled with  
554 NaCl (2M) and placed in layers II/III of PFC and BC. Platinum/iridium metal microelectrodes  
555 (Harvard apparatus United Kingdom, 161 Cambridge, United Kingdom) were placed on layer  
556 II/III of the mPFC and the BC, about 300 μm away from the 1MΩ recording electrode, and  
557 were used to evoke field excitatory postsynaptic potentials (fEPSPs). Local field potentials  
558 (LFPs) were amplified using a headstage with selectable high pass filter of 30 Hz to remove  
559 any offsets coupled to a Dagan BVC-700A amplifier, amplified 100 times and low-pass filtered  
560 at 1-kHz. A notch filter was used to eliminate line frequency noise at 30 Hz. Signals were  
561 digitized using the ITC-18 board (InstruTech, Inc.) on a PC with custom-made procedures in  
562 IgorPro (Wavemetrics, Inc.) and stored on a PC hard drive. All voltage signals were collected  
563 at a sampling frequency of 100 kHz (fs = 100 kHz).

564 For evoked fEPSPs, the electrical stimulus consisted of a single square waveform of  
565 100 μs duration given at intensities of 0.1– 0.3 mA (current was increased from 0.1 mA to 0.3  
566 mA, with 0.1 mA steps) generated by a stimulator equipped with a stimulus isolation unit  
567 (World Precision Instruments, Inc.). The effect of GABA<sub>A</sub>R activation was investigated by bath  
568 application of 2 μM Diazepam (GABA<sub>A</sub>R agonist). Diazepam was acquired from the Pharmacy  
569 of the University General Hospital in Heraklion as a 5 mg/ml solution and was diluted in aCSF  
570 during recordings.

571 Data Analysis: Data were analyzed using custom-written procedures in IgorPro software  
572 (Wavemetrics, Inc.). No additional high-pass filters were applied to the raw data. For evoked  
573 recordings, the peak values of the fEPSP were measured using the minimum value of the  
574 synaptic response (4–5 ms following stimulation) and were compared to the baseline value  
575 prior to stimulation. Both parameters were monitored in real- time in every experiment. A  
576 stimulus–response curve was then plotted using stimulation intensities between 0.1 and 0.8

577 mA, in 0.1 mA steps. For each different intensity level, two traces were acquired and  
578 averaged.

579

### 580 ***In vitro* patch-clamp recordings**

581 Slice Preparation: Mice were decapitated under halothane anesthesia. The brain was  
582 removed immediately and coronal slices of mPFC and BC (300–350  $\mu\text{m}$  thick), using a  
583 vibratome (Leica, VT1000S, Leica Biosystems) were prepared from mice at the ages of P10  
584 and P20 in ice-cold oxygenated (95%  $\text{O}_2$  - 5%  $\text{CO}_2$ ) modified choline-based aCSF (in mM) 0.5  
585  $\text{CaCl}_2$ , 7 mM  $\text{MgSO}_4$ ; NaCl replaced by an equimolar concentration of choline). Slices were  
586 incubated for 30min at 32°C in an oxygenated normal aCSF containing (in mM): 126 NaCl, 3.5  
587 KCl, 1.2  $\text{NaH}_2\text{PO}_4$ , 26  $\text{NaHCO}_3$ , 1.3  $\text{MgCl}_2$ , 2.0  $\text{CaCl}_2$ , and 10 D-glucose, pH 7.4, 315 mOsm/l.  
588 Slices were allowed to equilibrate for at least 30 min at RT before being transferred to the  
589 recording chamber. During recordings, slices were perfused at a rate of 4 ml/min with  
590 continuously aerated (95%  $\text{O}_2$ -5%  $\text{CO}_2$ ) normal aCSF at RT.

591 Data Acquisition: Neurons were impaled with patch pipettes (5–7  $\text{M}\Omega$ ) and recorded in the  
592 whole-cell configuration, either in the current-clamp or voltage-clamp mode. For current-  
593 clamp experiments, the composition of the intracellular solution was: 130 mM K-MeSO<sub>4</sub>, 5  
594 mM KCl, 5 mM NaCl, 10 mM HEPES, 2.5 mM Mg-ATP, and 0.3 mM GTP, 265–275 mOsm, pH  
595 7.3. For voltage-clamp experiments, the composition of the intracellular solution was: 120  
596 mM Cs-gluconate, 20mM CsCl, 0.1 mM  $\text{CaCl}_2$ , 1 mM EGTA, 0.4 mM Na-guanosine  
597 triphosphate, 2mM Mg-adenosine triphosphate, 10 mM HEPES. No correction from liquid  
598 junction potential was applied between the pipette and the aCSF. Whole-cell measurements  
599 were low-pass filtered at 5 kHz using an Axopatch 200B amplifier (Molecular Devices, Inc).  
600 Recordings were digitized with the ITC-18 board (Instrutech, Inc) on a PC using custom-made  
601 codes in IgorPro (Wavemetrics, Inc). All signals were collected at a sampling frequency of  
602 20kHz.

603 Data Analysis: Data were analyzed using custom-written codes in IgorPro software  
604 (Wavemetrics, Inc.). For passive membrane properties, the resting membrane potential  
605 (RMP, mV) was measured within 3 min after establishing the whole-cell configuration, and  
606 monitored throughout the experiment. To measure input resistance, a 500ms step-pulse  
607 protocol was used with current stimulation from -200pA to +50pA. The input resistance ( $R_{in}$ ,  
608  $\text{M}\Omega$ ) was measured by plotting the steady-state voltage deflection in an I-V plot and



609 calculating the slope of the best fit line curve ( $R_{in}=V/I$ ). The  $\tau_m$  (membrane time constant, ms)  
610 was obtained by fitting a single exponential curve to the voltage deflection at -50pA, and the  
611 membrane capacitance ( $C_m$ ) was calculated using the formula  $C_m = \tau_m/R_{in}$ . In addition, the  
612 number of spikes generated in response to a 500ms step-pulse range from +100pA to +300pA  
613 was measured.

614 To measure action potentials (APs) properties, we applied small supra-threshold 5ms  
615 step-pulse currents to the cell from -65mV. The active properties were measured at the  
616 minimum current stimulation (Rheobase, pA) that generated an AP. The AP threshold (mV)  
617 was calculated by taking the first derivative of the voltage trace, defining a threshold and  
618 identifying the voltage level at that time point. The rate of rise of the AP (dV/dt, mV/ms) was  
619 the maximum value of that first derivative trace. The AP amplitude (mV) was defined as the  
620 voltage difference between AP threshold and AP peak. The AP duration (ms) was calculated  
621 by the full width of the waveform at the half maximal amplitude (half-width). The  
622 afterhyperpolarization (AHP) minimum (mV) was defined as the minimum voltage right after  
623 the AP. The AHP amplitude (mV) was calculated as the difference between the AHP minimum  
624 and the AP threshold. The AHP time (ms) was defined as the time duration from the time  
625 point of AP threshold to the AHP minimum.

626 The composition of our intracellular solution resulted in chloride reversal potential of  
627 -60mV and  $Na^+/K^+$  reversal potential of +10mV. This allowed for measurements of  
628 spontaneous excitatory postsynaptic currents (sEPSCs) to be recorded at -60mV and of  
629 spontaneous inhibitory postsynaptic currents (sIPSCs) to be recorded at +10mV.  
630 Automatically selected events were subsequently visually monitored to discard erroneously  
631 included noise. The events showing only single peaks were selected for kinetics analysis. All  
632 currents detected from every single neuron were averaged. The peak amplitude was  
633 calculated as the maximum current value. The time constant of the decay phase was detected  
634 by curve fitting with a single exponential decay function.

635

### 636 ***In vivo* extracellular recordings**

637 Surgery: Multisite extracellular recordings were performed in the PFC of P8–P10 (n=13) and  
638 P20–P23 (n=14) C57/BL mice with both sexes. Mice were under urethane anesthesia  
639 (intraperitoneal injection, 1 mg/g body weight; Sigma-Aldrich) before surgery. The bone over  
640 the mPFC (0.8 mm anterior to bregma, 0.1–0.5 mm right to the midline) was carefully

641 removed. One-shank electrodes with 4 recording sites (0.4–0.8 M $\Omega$  impedance, 100  $\mu$ m  
642 spacing, NeuroNexus) was inserted into PFC at a depth of 1.9 mm from the skull surface.  
643 Electrodes were labelled with Dil (1,1'-dioctadecyl-3,3,3',3'-tetramethyl indocarbocyanine;  
644 Invitrogen) to confirm their position after histological assessment post-mortem. One silver  
645 wire was inserted into the cerebellum to serve as ground and reference electrode.

646 Data Acquisition: A recovery period of 10 min following the insertion of electrodes before  
647 acquisition of data was provided. Data acquired during the first 30 min of recording were used  
648 for analysis to ensure similar state of anesthesia in all investigated pups. Extracellular signals  
649 were bandpass filtered (0.1 Hz to 5 kHz) and digitized (32 kHz) with a multichannel  
650 extracellular amplifier (Digital Lynx SX, Neuralynx) and the Cheetah acquisition software  
651 (Neuralynx).

652 Data Analysis: Data were imported and analyzed off-line using custom-written tools in  
653 MATLAB software version 7.7 (MathWorks). Multiple unit activity (MUA) is detected when  
654 negative deflections exceeding five times the SD of the bandpass filtered (500–5000 Hz)  
655 signals.

656

### 657 **Immunohistochemistry**

658 Mice at the age of P10 and P20 were perfused with 4% paraformaldehyde, followed by  
659 fixation with the same solution for 1h at 4°C, followed by cryoprotection and preparation of  
660 12  $\mu$ m cryostat sections as previously described<sup>88</sup>. Primary antibodies used were rat  
661 monoclonal anti-GFP (Nacalai Tesque, Kyoto, Japan, 1:5000), rabbit polyclonal anti-GFP  
662 (1:500; Minotech biotechnology, Heraklion, Greece) and rabbit polyclonal anti- parvalbumin  
663 (PV) (Swant, Bellinzona, Switzerland; 1:2000. Secondary antibodies used were goat anti-rat-  
664 Alexa Fluor-488, goat anti-rabbit Alexa Fluor-488, and goat anti-rabbit-Alexa Fluor-555  
665 (Molecular Probes, Eugene, OR, United States, 1:800). Images were obtained with a confocal  
666 microscope (Leica TCS SP2, Leica, Nussloch, Germany). For each age group (P10, P20), 2-4  
667 10 $\mu$ m-thick sections from each mouse brain were selected, all including the mPFC and BC.

668

### 669 **RNA *In Situ* Hybridization**

670 Non-radioactive *in situ* hybridization experiments were performed on cryostat sections  
671 (12 $\mu$ m thick, see immunochemistry) according to the protocol described<sup>86</sup>. Riboprobe was  
672 prepared by *in vitro* transcription and was specific Somatostatin (SST)<sup>37</sup>.

673

## 674 **Nissl Staining**

675 Cryostat sections (12µm thick, see immunochemistry) were incubated in 1:1 100%  
676 ethanol:chloroform overnight at RT. Then, sections were rehydrated for 1 min in 100%, 95%  
677 ethanol solutions and dH<sub>2</sub>O at RT, followed by a 10-min incubation in 0.1% cresyl violet  
678 solution at 50°C. Sections were then dehydrated with dH<sub>2</sub>O, 95%, 100% ethanol and xylene  
679 for 5 min and coverslipped with permount. Images from whole sections were obtained in 5×  
680 magnification of a light microscope (Axioskop 2FS, Carl Zeiss AG, 268 Oberkochen, Germany)  
681 and merged using Adobe Photoshop CC 2015, Adobe Systems, Inc.

682

## 683 **Analysis for Immunochemistry, *in situ* hybridization and Nissl staining**

684 The background color of each cropped image was converted to black, while the cells were  
685 colored blue. The images were loaded into Matlab, where the number of 'blue' pixels was  
686 counted per area (mm<sup>2</sup>). Each cell was assumed to be composed of four pixels. Therefore, the  
687 number of cells was measured as the total number of 'blue' pixels divided by four<sup>87</sup>. An  
688 average number was calculated for the number of neurons from mPFC and BC sections from  
689 each developmental group.

690

## 691 **Western blots**

692 Mice were decapitated following cervical dislocation, the brain was quickly removed, placed  
693 in ice cold PBS (phosphate-buffered saline) and then positioned on a brain mould, where 1.5  
694 mm slices were taken containing the mPFC and BC. The slices were placed on dry ice, and the  
695 prelimbic area of mPFC was dissected out and stored at -80°C. The BC was also isolated from  
696 the corresponding slices and stored at -80°C. Frozen tissue blocks were lysed in a solution  
697 containing (in mM) HEPES 50, NaCl 150, MgCl<sub>2</sub> 1.5, EGTA 5, Glycerol 1%, Triton-X100 1%,  
698 1:1000 protease inhibitors cocktail. Proteins ran on 8.5% bis-acrylamide gel and were  
699 transferred onto a nitrocellulose membrane (Whatman GmbH, Dassel, Germany). The  
700 membrane was blocked, incubated in rabbit polyclonal anti-K<sup>+</sup>/Cl<sup>-</sup>-Cotransporter (KCC2)  
701 (Merck KGaA, Darmstadt, Germany, 1:1000) or rabbit monoclonal anti-GAPDH (Cell Signaling  
702 Technology Europe BV, Leiden, Netherlands, 1:1000), washed, incubated in secondary goat  
703 anti-rabbit IgG Horseradish Peroxidase Conjugate antibody (Invitrogen, 1:5000), and digitally  
704 exposed using the Molecular Imaging system ChemiDoc (BioRad Laboratories, Inc, California,

705 U.S.A.). Analysis of KCC2 and GAPDH expression was performed with ImageJ software, and  
706 the raw values of KCC2 from each sample were normalized to their respective GAPDH values.

707

### 708 **Statistical analysis**

709 Statistical analyses were performed in Microsoft Office Excel 2007 and GraphPad Prism  
710 Software 7.0. Data are presented as mean  $\pm$  standard error of mean (SEM). Normality  
711 distribution and equality of variances of dataset were tested with the Kolmogorov-Smirnov  
712 test normality test. The null hypothesis was rejected for a  $>5\%$ . When four experimental  
713 groups (P10 mPFC, P20 mPFC, P10 BC and P20 BC) were assessed and two variables were  
714 taken into consideration (age and brain area), data were analyzed with a two-way ANOVA  
715 with Fisher LSD, Sidak's or Tukey's multiple comparisons (electrophysiological recordings and  
716 cell counting). When three groups (P10 mPFC, P20 mPFC and P10 BC) data were analyzed with  
717 one- way ANOVA (electrophysiological recordings). For the comparison of *in vivo* spiking  
718 activity between P10 and P20, statistical analyses were performed with MATLAB. Significant  
719 differences were detected by one-way ANOVA. Significance levels of \* $p < 0.05$ , \*\* $p < 0.01$ ,  
720 \*\*\* $p < 0.001$  or \*\*\*\* $p < 0.0001$  were tested. For comparison of Western blot analysis, the  
721 significant effect of each developmental age group from mPFC and BC was assessed using  
722 Student's t-test depending on the experiment.

723

### 724 **Reference:**

- 725 1. Khazipov, R. *et al.* Early motor activity drives spindle bursts in the developing  
726 somatosensory cortex. *Nature* **432**, 758–761 (2004).
- 727 2. Khazipov, R. & Luhmann, H. J. Early patterns of electrical activity in the developing  
728 cerebral cortex of humans and rodents. *Trends in Neurosciences* **29**, 414–418  
729 (2006).
- 730 3. Allene, C. *et al.* Sequential Generation of Two Distinct Synapse-Driven Network  
731 Patterns in Developing Neocortex. *J. Neurosci.* **28**, 12851–12863 (2008).
- 732 4. Khazipov, R., Minlebaev, M. & Valeeva, G. Early gamma oscillations. *Neuroscience*  
733 **250**, 240–252 (2013).
- 734 5. Brockmann, M. D., Pöschel, B., Cichon, N. & Hanganu-Opatz, I. L. Coupled  
735 Oscillations Mediate Directed Interactions between Prefrontal Cortex and  
736 Hippocampus of the Neonatal Rat. *Neuron* **71**, 332–347 (2011).
- 737 6. Southwell, D. G. *et al.* Intrinsically determined cell death of developing cortical  
738 interneurons. *Nature* **491**, 109–113 (2012).
- 739 7. Ben-Ari, Y., Khalilov, I., Kahle, K. T. & Cherubini, E. The GABA Excitatory/Inhibitory  
740 Shift in Brain Maturation and Neurological Disorders. *The Neuroscientist* **18**, 467–  
741 486 (2012).

- 742 8. Kirmse, K. *et al.* GABA depolarizes immature neurons and inhibits network  
743 activity in the neonatal neocortex in vivo. *Nature Communications* **6**, 7750  
744 (2015).
- 745 9. Mòdol, L. *et al.* Assemblies of Perisomatic GABAergic Neurons in the Developing  
746 Barrel Cortex. *Neuron* 1–18 (2019). doi:10.1016/j.neuron.2019.10.007
- 747 10. Ben-Ari, Y. Refuting the challenges of the developmental shift of polarity of GABA  
748 actions: GABA more exciting than ever! 1–18 (2012).  
749 doi:10.3389/fncel.2012.00035/abstract
- 750 11. Ben-Ari, Y. Developing networks play a similar melody. *Trends in Neurosciences*  
751 **24**, 353–360 (2001).
- 752 12. Ben-Ari, Y., Gaiarsa, J. L., Tyzio, R. & Khazipov, R. GABA: A Pioneer Transmitter  
753 That Excites Immature Neurons and Generates Primitive Oscillations.  
754 *Physiological Reviews* **87**, 1215–1284 (2007).
- 755 13. Ben-Ari, Y. Excitatory actions of gaba during development: the nature of the  
756 nurture. *Nat Rev Neurosci* **3**, 728–739 (2002).
- 757 14. Burgard, E. C. & Hablitz, J. J. Developmental changes in NMDA and non-NMDA  
758 receptor-mediated synaptic potentials in rat neocortex. *Journal of*  
759 *Neurophysiology* **69**, 230–240 (1993).
- 760 15. Kriegstein, A. R., Suppes, T. & Prince, D. A. Cellular and synaptic physiology and  
761 epileptogenesis of developing rat neocortical neurons in vitro. *Developmental*  
762 *Brain Research* **34**, 161–171 (1987).
- 763 16. McCormick, D. A. & Prince, D. A. Post-natal development of electrophysiological  
764 properties of rat cerebral cortical pyramidal neurones. *The Journal of Physiology*  
765 **393**, 743–762 (1987).
- 766 17. Bahrey, H. L. P. & Moody, W. J. Early Development of Voltage-Gated Ion Currents  
767 and Firing Properties in Neurons of the Mouse Cerebral Cortex. *Journal of*  
768 *Neurophysiology* **89**, 1761–1773 (2003).
- 769 18. Ramoa, A. S. & McCormick, D. A. Developmental changes in electrophysiological  
770 properties of LGNd neurons during reorganization of retinogeniculate  
771 connections. *J. Neurosci.* **14**, 2089–2097 (1994).
- 772 19. Bartolini, G., Ciceri, G. & Marin, O. Integration of GABAergic Interneurons into  
773 Cortical Cell Assemblies: Lessons from Embryos and Adults. **79**, 849–864 (2013).
- 774 20. Le Magueresse, C. & Monyer, H. GABAergic Interneurons Shape the Functional  
775 Maturation of the Cortex. *Neuron* **77**, 388–405 (2013).
- 776 21. Hensch, T. K. The Power of the Infant Brain. *Nature Publishing Group* **314**, 64–69  
777 (2016).
- 778 22. Guo, Z. V. *et al.* Flow of Cortical Activity Underlying a Tactile Decision in Mice.  
779 *Neuron* **81**, 179–194 (2014).
- 780 23. Fuster, J. *The Prefrontal Cortex*. (Academic Press, 2015).
- 781 24. Van De Werd, H. J. J. M., Rajkowska, G., Evers, P. & Uylings, H. B. M.  
782 Cytoarchitectonic and chemoarchitectonic characterization of the prefrontal  
783 cortical areas in the mouse. *Brain Struct Funct* **214**, 339–353 (2010).
- 784 25. Heidbreder, C. A. & Groenewegen, H. J. The medial prefrontal cortex in the rat:  
785 evidence for a dorso-ventral distinction based upon functional and anatomical  
786 characteristics. *Neuroscience & Biobehavioral Reviews* **27**, 555–579 (2003).
- 787 26. Best, J. R. & Miller, P. H. A Developmental Perspective on Executive Function.  
788 *Child Development* **81**, 1641–1660 (2010).

- 789 27. Casey, B. J., Giedd, J. N. & Thomas, K. M. Structural and functional brain  
790 development and its relation to cognitive development. *Biological Psychology* **54**,  
791 241–257 (2000).
- 792 28. Kolb, B. *et al.* Experience and the developing prefrontal cortex. *Proc. Natl. Acad.*  
793 *Sci. U.S.A.* **109**, 17186–17193 (2012).
- 794 29. Tsujimoto, S. The prefrontal cortex: functional neural development during early  
795 childhood. *The Neuroscientist* **14**, 345–358 (2008).
- 796 30. Kroeze, Y. *et al.* Transcriptome Analysis Identifies Multifaceted Regulatory  
797 Mechanisms Dictating a Genetic Switch from Neuronal Network Establishment  
798 to Maintenance During Postnatal Prefrontal Cortex Development. *Cerebral*  
799 *Cortex* 1–19 (2017). doi:10.1093/cercor/bhw407
- 800 31. Schubert, D., Martens, G. J. M. & Kolk, S. M. Molecular underpinnings of  
801 prefrontal cortex development in rodents provide insights into the etiology of  
802 neurodevelopmental disorders. **20**, 795–809 (2014).
- 803 32. Diamond, A. in *Principles of Frontal Lobe Function* 466–503 (Oxford University  
804 Press, 2005). doi:10.1093/acprof:oso/9780195134971.003.0029
- 805 33. Bitzenhofer, S. H., Sieben, K., Siebert, K. D., Spehr, M. & Hanganu-Opatz, I. L.  
806 Oscillatory Activity in Developing Prefrontal Networks Results from Theta-  
807 Gamma-Modulated Synaptic Inputs. *CellReports* **11**, 486–497 (2015).
- 808 34. Bitzenhofer, S. H. *et al.* Layer-specific optogenetic activation of pyramidal  
809 neurons causes beta-gamma entrainment of neonatal networks. *Nature*  
810 *Communications* **8**, 14563 (2017).
- 811 35. Clancy, B., Darlington, R. B., Neuroscience, B. F. 2001. Translating developmental  
812 time across mammalian species. *Elsevier* **105**, 7–17 (2001).
- 813 36. DeFelipe, J. & Fariñas, I. The pyramidal neuron of the cerebral cortex:  
814 Morphological and chemical characteristics of the synaptic inputs. *Progress in*  
815 *Neurobiology* **39**, 563–607 (1992).
- 816 37. Liodis, P. *et al.* Lhx6 Activity Is Required for the Normal Migration and  
817 Specification of Cortical Interneuron Subtypes. *Journal of Neuroscience* **27**, 3078–  
818 3089 (2007).
- 819 38. Huguenard, J. R., Hamill, O. P. & Prince, D. A. Developmental changes in Na<sup>+</sup>  
820 conductances in rat neocortical neurons: appearance of a slowly inactivating  
821 component. *Journal of Neurophysiology* **59**, 778–795 (1988).
- 822 39. Pan, G., Yang, J.-M., Hu, X.-Y. & Li, X.-M. Postnatal development of the  
823 electrophysiological properties of somatostatin interneurons in the anterior  
824 cingulate cortex of mice. *Nature Publishing Group* 1–12 (2017).  
825 doi:10.1038/srep28137
- 826 40. Yang, J. M., Zhang, J., Yu, Y. Q., Duan, S. & Li, X. M. Postnatal Development of 2  
827 Microcircuits Involving Fast-Spiking Interneurons in the Mouse Prefrontal Cortex.  
828 *Cerebral Cortex* **24**, 98–109 (2013).
- 829 41. Forloni, G., Hohmann, C., Research, J. C. D. B. 1990. Developmental expression of  
830 somatostatin in mouse brain. I. Immunocytochemical studies. *Elsevier* **53**, 6–25  
831 (1990).
- 832 42. Bendotti, C., Hohmann, C., Forloni, G., Brain, R. R. D. 1990. Developmental  
833 expression of somatostatin in mouse brain. II. In situ hybridization. *Elsevier* **53**,  
834 26–39 (1990).

- 835 43. Del Rio, J. A., Soriano, E. & Ferrer, I. Development of GABA-immunoreactivity in  
836 the neocortex of the mouse. *J. Comp. Neurol.* **326**, 501–526 (1992).
- 837 44. Ben-Ari, Y., Cherubini, E., Corradetti, R. & Gaiarsa, J. L. Giant synaptic potentials  
838 in immature rat CA3 hippocampal neurones. *The Journal of Physiology* **416**, 303–  
839 325 (1989).
- 840 45. Gullledge, A. T. & Stuart, G. J. Excitatory Actions of GABA in the Cortex. *Neuron*  
841 **37**, 299–309 (2003).
- 842 46. LoTurco, J. J., Owens, D. F., Heath, M. J. S., Davis, M. B. E. & Kriegstein, A. R. GABA  
843 and glutamate depolarize cortical progenitor cells and inhibit DNA synthesis.  
844 *Neuron* **15**, 1287–1298 (1995).
- 845 47. Luhmann, H. J. & Prince, D. A. Postnatal maturation of the GABAergic system in  
846 rat neocortex. *Journal of Neurophysiology* **65**, 247–263 (1991).
- 847 48. Martina, M., Royer, S. & Paré, D. Cell-Type-Specific GABA Responses and Chloride  
848 Homeostasis in the Cortex and Amygdala. *Journal of Neurophysiology* **86**, 2887–  
849 2895 (2001).
- 850 49. Owens, D. F., Boyce, L. H., Davis, M. B. E. & Kriegstein, A. R. Excitatory GABA  
851 Responses in Embryonic and Neonatal Cortical Slices Demonstrated by  
852 Gramicidin Perforated-Patch Recordings and Calcium Imaging. *J. Neurosci.* **16**,  
853 6414–6423 (1996).
- 854 50. Rivera, C. *et al.* The K<sup>+</sup>/Cl<sup>-</sup> co-transporter KCC2 renders GABA hyperpolarizing  
855 during neuronal maturation. *Nature* **397**, 251–255 (1999).
- 856 51. Kaila, K. & Voipio, J. Postsynaptic fall in intracellular p H induced by GABA-  
857 activated bicarbonate conductance. *Nature* **330**, 163–165 (1987).
- 858 52. Yamada, J. *et al.* Cl<sup>-</sup> uptake promoting depolarizing GABA actions in immature  
859 rat neocortical neurones is mediated by NKCC1. *The Journal of Physiology* **557**,  
860 829–841 (2004).
- 861 53. Plotkin, M. D., Snyder, E. Y., Hebert, S. C. & Delpire, E. Expression of the Na-K-2Cl  
862 cotransporter is developmentally regulated in postnatal rat brains: A possible  
863 mechanism underlying GABA's excitatory role in immature brain. *J. Neurobiol.* **33**,  
864 781–795 (1997).
- 865 54. Ganguly, K., Schinder, A. F., Wong, S. T. & Poo, M.-M. GABA Itself Promotes the  
866 Developmental Switch of Neuronal GABAergic Responses from Excitation to  
867 Inhibition. *Cell* **105**, 521–532 (2001).
- 868 55. Fiumelli, H., Cancedda, L. & Poo, M.-M. Modulation of GABAergic Transmission  
869 by Activity via Postsynaptic Ca<sup>2+</sup>-Dependent Regulation of KCC2 Function.  
870 *Neuron* **48**, 773–786 (2005).
- 871 56. Lu, J., Karadshah, M. & Delpire, E. Developmental regulation of the neuronal-  
872 specific isoform of K-CL cotransporter KCC2 in postnatal rat brains. *J. Neurobiol.*  
873 **39**, 558–568 (1999).
- 874 57. Dzhalal, V. I. *et al.* NKCC1 transporter facilitates seizures in the developing brain.  
875 *Nature Medicine* 2005 11:11 **11**, 1205–1213 (2005).
- 876 58. Doischer, D. *et al.* Postnatal Differentiation of Basket Cells from Slow to Fast  
877 Signaling Devices. *J. Neurosci.* **28**, 12956–12968 (2008).
- 878 59. Miyamae, T., Chen, K., Lewis, D. A. & González-Burgos, G. Distinct physiological  
879 maturation of parvalbumin-positive neuron subtypes in mouse prefrontal cortex.  
880 *J. Neurosci.* 3325–16–48 (2017). doi:10.1523/JNEUROSCI.3325-16.2017

- 881 60. Caballero, A., Flores-Barrera, E., Cass, D. K. & Tseng, K. Y. Differential regulation  
882 of parvalbumin and calretinin interneurons in the prefrontal cortex during  
883 adolescence. *Brain Struct Funct* **219**, 395–406 (2014).
- 884 61. Spampinato, J. & Sullivan, R. Development and physiology of GABAergic  
885 feedback excitation in parvalbumin expressing interneurons of the mouse  
886 basolateral amygdala. *Physiological ...* **4**, e12664–15 (2016).
- 887 62. del Rio, J., De Lecea, L., Ferrer, I. & Soriano, E. The development of parvalbumin-  
888 immunoreactivity in the neocortex of the mouse. **81**, 247–259 (1994).
- 889 63. de Lecea, L., del Rio, J. A. & Soriano, E. Developmental expression of parvalbumin  
890 mRNA in the cerebral cortex and hippocampus of the rat. *Molecular Brain*  
891 *Research* **32**, 1–13 (1995).
- 892 64. Zheng, K., An, J. J., Yang, F. & Xu, W. TrkB signaling in parvalbumin-positive  
893 interneurons is critical for gamma-band network synchronization in  
894 hippocampus. in (2011). doi:10.1073/pnas.1114241108/-/DCSupplemental
- 895 65. Ferguson, B. R. & Gao, W.-J. PV Interneurons: Critical Regulators of E/I Balance  
896 for Prefrontal Cortex-Dependent Behavior and Psychiatric Disorders. *Front*  
897 *Neural Circuits* **12**, 479–13 (2018).
- 898 66. González-Burgos, G. *et al.* Functional Maturation of GABA Synapses During  
899 Postnatal Development of the Monkey Dorsolateral Prefrontal Cortex. *Cerebral*  
900 *Cortex* **25**, 4076–4093 (2015).
- 901 67. Kroon, T., van Hugte, E., van Linge, L., Mansvelder, H. D. & Meredith, R. M. Early  
902 postnatal development of pyramidal neurons across layers of the mouse medial  
903 prefrontal cortex. *Scientific Reports* **9**, 5037–16 (2019).
- 904 68. Golshani, P. *et al.* Internally Mediated Developmental Desynchronization of  
905 Neocortical Network Activity. *J. Neurosci.* **29**, 10890–10899 (2009).
- 906 69. Frye, C. G. & MacLean, J. N. Spontaneous activations follow a common  
907 developmental course across primary sensory areas in mouse neocortex. *Journal*  
908 *of Neurophysiology* **116**, 431–437 (2016).
- 909 70. Bitzenhofer, S. H., Poeppelau, J. A., Chini, M., Marquardt, A. & Hanganu-Opatz, I.  
910 Activity-dependent maturation of prefrontal gamma oscillations sculpts cognitive  
911 performance. *bioRxiv* 1–39 (2019). doi:10.1101/558957
- 912 71. Zhang, Z., Jiao, Y.-Y. & Sun, Q.-Q. Developmental maturation of excitation and  
913 inhibition balance in principal neurons across four layers of somatosensory  
914 cortex. *Neuroscience* **174**, 10–25 (2011).
- 915 72. Zhu, J. J. Maturation of layer 5 neocortical pyramidal neurons: amplifying salient  
916 layer 1 and layer 4 inputs by Ca<sup>2+</sup> action potentials in adult rat tuft dendrites.  
917 *The Journal of Physiology* **526**, 571–587 (2000).
- 918 73. Romand, S., Wang, Y., Toledo-Rodriguez, M. & Markram, H. Morphological  
919 Development of Thick-Tufted Layer V Pyramidal Cells in the Rat Somatosensory  
920 Cortex. *Front. Neuroanat.* **5**, (2011).
- 921 74. Kilb, W. Development of the GABAergic System from Birth to Adolescence. *The*  
922 *Neuroscientist* **18**, 613–630 (2012).
- 923 75. Benes, F. M. Deficits in Small Interneurons in Prefrontal and Cingulate Cortices of  
924 Schizophrenic and Schizoaffective Patients. *Archives of General Psychiatry* **48**,  
925 996–1001 (1991).
- 926 76. Andersen, S. L. Trajectories of brain development: point of vulnerability or  
927 window of opportunity? *Neuroscience & Biobehavioral Reviews* **27**, 3–18 (2003).



- 928 77. Huttenlocher, P. R. Morphometric study of human cerebral cortex development.  
929 *Neuropsychologia* **28**, 517–527 (1990).
- 930 78. Caballero, A., Granberg, R. & Tseng, K. Y. Mechanisms contributing to prefrontal  
931 cortex maturation during adolescence. *Neuroscience & Biobehavioral Reviews* 1–  
932 29 (2016). doi:10.1016/j.neubiorev.2016.05.013
- 933 79. Weinberger, D. R. Physiologic Dysfunction of Dorsolateral Prefrontal Cortex in  
934 Schizophrenia. *Archives of General Psychiatry* **43**, 114 (1986).
- 935 80. Fernandez, A. *et al.* The GABA Developmental Shift Is Abolished by Maternal  
936 Immune Activation Already at Birth. *Cerebral Cortex* **130**, e1447–11 (2018).
- 937 81. Corradini, I. *et al.* Maternal Immune Activation Delays Excitatory-to-Inhibitory  
938 Gamma-Aminobutyric Acid Switch in Offspring. *Biological Psychiatry* **83**, 680–691  
939 (2018).
- 940 82. Yuan, Y. *et al.* Delayed maturation of GABAergic signaling in the Scn1a and Scn1b  
941 mouse models of Dravet Syndrome. *Scientific Reports* 1–16 (2019).  
942 doi:10.1038/s41598-019-42191-0
- 943 83. Amin, H., Marinaro, F., De Pietri Tonelli, D. & Berdondini, L. Developmental  
944 excitatory-to-inhibitory GABA-polarity switch is disrupted in 22q11.2 deletion  
945 syndrome: a potential target for clinical therapeutics. *Scientific Reports* 1–18  
946 (2017). doi:10.1038/s41598-017-15793-9
- 947 84. He, Q. *et al.* Critical period inhibition of NKCC1 rectifies synapse plasticity in the  
948 somatosensory cortex and restores adult tactile response maps in fragile X mice.  
949 *Mol Psychiatry* **8**, 109–16 (2018).
- 950 85. Moore, Y. E., Kelley, M. R., Brandon, N. J., Deeb, T. Z. & Moss, S. J. Seizing Control  
951 of KCC2: A New Therapeutic Target for Epilepsy. *Trends in Neurosciences* **40**, 555–  
952 571 (2017).
- 953 86. Schaeren-Wiemers, N. & Gerfin-Moser, A. A single protocol to detect transcripts  
954 of various types and expression levels in neural tissue and cultured cells: in situ  
955 hybridization using digoxigenin-labelled cRNA probes. *Histochemistry* **100**, 431–  
956 440 (1993).
- 957 87. Konstantoudaki, X., Chalkiadaki, K., Tivodar, S., Karagogeos, D. & Sidiropoulou, K.  
958 Impaired synaptic plasticity in the prefrontal cortex of mice with developmentally  
959 decreased number of interneurons. *Neuroscience* 1–13 (2016).  
960 doi:10.1016/j.neuroscience.2016.02.048
- 961 88. Vidaki, M., Tivodar, S., Doulgeraki, K., Tybulewicz, V., Kessaris, N., Pachnis, V.,  
962 Karagogeos, D. (2012). Rac1-Dependent Cell Cycle Exit of MGE Precursors and  
963 GABAergic Interneuron Migration to the Cortex Cerebral Cortex 22(), 680 - 692.  
964  
965

## 966 **Acknowledgements:**

967 Authors are grateful to Dr. Myrto Denaxa for her comments on the manuscript, to  
968 Emmanuella Foinikianaki for her help with Matlab analysis and histology and to Giasemi  
969 Eptaminotaki for her help in *in situ* hybridization experiments. They also would like to thank all  
970 the members of Karagogeos and Sidiropoulou Labs and the animal facility of the IMBB for

971 help with experiments. This study was co-financed through the Operational Program  
972 “Education and Lifelong Learning” of the National Strategic Reference Framework – Research  
973 Funding Program (EDBM34) by a grant to DK (10040) and through the BIOIMAGING-GR,  
974 National Roadmap for Research Infrastructures from the European Union (European Social  
975 Fund-ESF) and Greek National Funds. KK has been a recipient of the Manasaki fellowship and  
976 a Medical School fellowship of the University of Crete and a poster award at the 27th Hellenic  
977 Society for Neuroscience Meeting.

978 **Author Contributions:**

979 All experiments were conceived and designed by K.K., K.S., and D.K. All experiments  
980 performed by K.K. Data were analyzed by K.K., K.S. and discussed with D.K., X.X. and I.L.H.-  
981 O. X.X. carried out and analyzed the *in vivo* experiments. Manuscript was written by K.K., D.K.  
982 and K.S. All authors discussed and commented on the manuscript.

983

984

985

986

987

988

989

990

991

992

993

994

995

996

997

998 **Table 1. Intrinsic electrophysiological properties of pyramidal neurons and interneurons in**  
 999 **mPFC and BC at P10 and P20.**

| <b>Pyramidal Neurons</b>                    |                           |                     |                          |                    |
|---------------------------------------------|---------------------------|---------------------|--------------------------|--------------------|
|                                             | P10 mPFC                  | P20 mPFC            | P10 BC                   | P20 BC             |
| Resting membrane potential, RMP (mv)        | -65.55 ± 0.70, n=9        | -65.63 ± 0.47, n=10 | -65.14 ± 0.84, n=9       | -65.45 ± 0.82, n=8 |
| Input Resistance (MΩ)                       | 202.4 ± 9.12, n=9         | 179.8 ± 17.35, n=10 | 182.3 ± 21.74, n=7       | 145.6 ± 13.9, n=7  |
| Membrane time constant, τ <sub>m</sub> (ms) | 16.49 ± 1.97, n=7         | 18.8 ± 2.16, n=10   | 17.64 ± 2.13, n=7        | 20.42 ± 1.5, n=6   |
| Membrane Capacitance, C <sub>m</sub> (pF)   | <b>70.64 ± 10.12, n=7</b> | 111 ± 7.79, n=9     | <b>80.24 ± 7.69, n=7</b> | 145.9 ± 17.59, n=5 |
| AP amplitude (mv)                           | <b>89.6 ± 1.82, n=8</b>   | 104.5 ± 3.13, n=12  | <b>83.27 ± 5.12, n=8</b> | 102.9 ± 5.35, n=7  |
| Rate of rise of AP: dV/dt (mv/ms)           | <b>146.5 ± 12.98, n=8</b> | 232.6 ± 12.38, n=11 | 151.8 ± 19.28, n=7       | 204.6 ± 28.84, n=8 |
| Duration of AP: Half-width (ms)             | 1.779 ± 0.07779, n=8      | 1.76 ± 0.08, n=14   | 1.94 ± 0.19, n=7         | 1.77 ± 0.14, n=8   |
| Rheobase (pA)                               | 266.7 ± 23.57, n=9        | 217.9 ± 15.38, n=14 | 227.8 ± 26.5, n=9        | 237.5 ± 33.74, n=8 |
| Threshold (mv)                              | -64.89 ± 0.89, n=9        | -65.96 ± 1.09, n=13 | -63.43 ± 1.52, n=7       | -65.65 ± 0.7, n=6  |

1000

| <b>Interneurons</b>                         |                           |                         |                           |
|---------------------------------------------|---------------------------|-------------------------|---------------------------|
|                                             | P10 mPFC                  | P20 mPFC                | P10 BC                    |
| Resting membrane potential, RMP (mv)        | -64.81 ± 2.11, n=6        | -62.22 ± 0.94, n=8      | -63.29 ± 1.54, n=9        |
| Input Resistance (MΩ)                       | <b>391.7 ± 73.62, n=8</b> | 129.2 ± 23.91, n=8      | 159.8 ± 17.89, n=9        |
| Membrane time constant, τ <sub>m</sub> (ms) | <b>36.94 ± 8.18, n=8</b>  | 20.72 ± 8.37, n=6       | 10.29 ± 2.45, n=8         |
| Membrane Capacitance, C <sub>m</sub> (pF)   | <b>80.9 ± 10.09, n=6</b>  | 272.6 ± 109.8, n=6      | 49.2 ± 3.67, n=7          |
| AP amplitude (mv)                           | <b>78.92 ± 4.15, n=6</b>  | 76.41 ± 8, n=8          | 57.56 ± 3.84, n=8         |
| Rate of rise of AP: dV/dt (mv/ms)           | 90.49 ± 3.7, n=6          | 166.7 ± 21.48, n=6      | <b>66.41 ± 4.24, n=8</b>  |
| Duration of AP: Half-width (ms)             | 2.24 ± 0.17, n=6          | <b>1.31 ± 0.15, n=8</b> | 2.49 ± 0.23, n=7          |
| Rheobase (pA)                               | 170 ± 20, n=5             | 150 ± 15.43, n=7        | 162.5 ± 15.67, n=8        |
| Threshold (mv)                              | -61.52 ± 1.5, n=5         | -56.58 ± 2.94, n=8      | -54.79 ± 3, n=9           |
| AHP amplitude (mv)                          | -4.65 ± 0.95, n=4         | -5.96 ± 0.72, n=6       | <b>-13.99 ± 1.69, n=7</b> |
| AHP time (ms)                               | 14.64 ± 1.29, n=5         | 13.26 ± 3.07, n=7       | 16.57 ± 2.47, n=7         |

1001 ± represents the standard error of mean and n represents the number of cells. **Bold** numbers indicate significant  
 1002 differences after post-hoc analysis (more details in figure legends).

1003

1004

1005

1006
